# Supplementary material for: Comparative performance and age dependence of tuberculin and defined antigen bovine tuberculosis skin tests assessed with Bayesian latent class analysis
Source: Research Square preprint supplement (doi:10.21203/rs.3.rs-5621295/v1), 2025-04-16
Supplement: Supplementary file 1 [file 9d2f4f64b719ddcade9e8083.docx]

**Comparative performance and age dependence of tuberculin and defined antigen bovine tuberculosis skin tests assessed with Bayesian latent class analysis**

Matios Lakew1,2**†***, Andrew J.K. Conlan3**†***, Biniam Tadesse2, Sreenidhi Srinivasan4, Bekele Yalew2, Teferi Benti2, Abebe Olani2, Getachew Kinfe2, Tigist Ashagrie2, Ashebir Abebe2, Abebe Fromsa1,5, Musse Girma Abdela1, Berecha Bayissa6, Solomon Gebre2, Adane Mihret7, Getnet Abie Mekonnen2, Gareth J. Jones8, Gobena Ameni1,9, Hagos Ashenafi1, James L.N. Wood3, Balako Gumi1 and Vivek Kapur10, 11*

**Affiliations:**

1Aklilu Lemma Institute of Pathobiology, Addis Ababa University, P.O. Box 1176, Addis Ababa, Ethiopia. 2Animal Health Institute, P.O. Box 04, Sebeta, Ethiopia. 3Disease Dynamics Unit, Department of Veterinary Medicine; University of Cambridge, United Kingdom. 4Global Health Initiative, Henry Ford Health, Detroit, MI 48202, USA. 5College of Veterinary Medicine and Agriculture, Addis Ababa University, Bishoftu, Ethiopia. 6National Veterinary Institute, Bishoftu, Ethiopia. 7Armauer Hansen Research Institute, Addis Ababa, Ethiopia. 8Animal and Plant Health Agency, Weybridge, UK. 9Department of Veterinary Medicine, College of Agriculture and Veterinary Medicine, United Arab Emirates University, PO Box 15551, Al Ain, United Arab Emirates. 10Department of Animal Science, The Pennsylvania State University, University Park, PA, United States. 11Huck Institutes of the Life Sciences, The Pennsylvania State University, University Park, PA, USA.

**†**These authors contributed equally

*Corresponding authors: Matios Lakew: matioslakew@gmail.com, Andrew J.K. Conlan: ajkc2@cam.ac.uk, Vivek Kapur: vxk1@psu.edu

**Supplementary Table 1:** Farm level apparent prevalence of bTB using CIT > 4 mm cut-off.

| Farm code | Initial test | | Repeated test | |
| --- | --- | --- | --- | --- |
| **n** | **No. positive (%)** | **n** | **No. positive (%)** |
| 1 | 46 | 3 (6.5) | 19 | 5 (26.3) |
| 2 | 27 | 8 (29.6) | 22 | 7 (31.8) |
| 3 | 6 | 0 |  |  |
| 4 | 31 | 1 (3.2) | 21 | 0 |
| 5 | 11 | 0 | 8 | 0 |
| 6 | 19 | 9 (47.4) |  |  |
| 7 | 17 | 0 | 10 | 0 |
| 8 | 14 | 1 (7.1) | 7 | 1 (14.3) |
| 9 | 10 | 2 (20) | 7 | 1 (14.3) |
| 10 | 5 | 0 |  |  |
| 11 | 14 | 2 (14.3) | 7 | 1 (14.3) |
| 12 | 13 | 0 | 8 | 3 (37.5) |
| 13 | 8 | 0 | 2 | 0 |
| 14 | 3 | 0 |  |  |
| 15 | 14 | 5 (35.7) |  |  |
| 16 | 8 | 1 (12.5) |  |  |
| 18 | 45 | 11 (24.4) |  |  |
| 19 | 53 | 38 (71.6) |  |  |
| 20 | 31 | 27 (87) | 31 | 19 (61.3) |
| 21 | 9 | 0 |  |  |
| 24 | 43 | 2 (4.6) |  |  |
| 25 | 19 | 14 (73.6) |  |  |
| Total | **446** | **124** | **142** | **37** |

**Supplementary Table 2:** Tabulation of all combinations (patterns) of possible test outcomes for 8 diagnostic tests

| Pattern | DST10 | DST30 | DSTF | SIT | CIT | CITz | IGRA | IDEXX |
| --- | --- | --- | --- | --- | --- | --- | --- | --- |
| 1 | - | - | - | - | - | - | - | - |
| 2 | + | - | - | - | - | - | - | - |
| 3 | - | + | - | - | - | - | - | - |
| 4 | + | + | - | - | - | - | - | - |
| 5 | - | - | + | - | - | - | - | - |
| 6 | + | - | + | - | - | - | - | - |
| 7 | - | + | + | - | - | - | - | - |
| 8 | + | + | + | - | - | - | - | - |
| 9 | - | - | - | + | - | - | - | - |
| 10 | + | - | - | + | - | - | - | - |
| 11 | - | + | - | + | - | - | - | - |
| 12 | + | + | - | + | - | - | - | - |
| 13 | - | - | + | + | - | - | - | - |
| 14 | + | - | + | + | - | - | - | - |
| 15 | - | + | + | + | - | - | - | - |
| 16 | + | + | + | + | - | - | - | - |
| 17 | - | - | - | - | + | - | - | - |
| 18 | + | - | - | - | + | - | - | - |
| 19 | - | + | - | - | + | - | - | - |
| 20 | + | + | - | - | + | - | - | - |
| 21 | - | - | + | - | + | - | - | - |
| 22 | + | - | + | - | + | - | - | - |
| 23 | - | + | + | - | + | - | - | - |
| 24 | + | + | + | - | + | - | - | - |
| 25 | - | - | - | + | + | - | - | - |
| 26 | + | - | - | + | + | - | - | - |
| 27 | - | + | - | + | + | - | - | - |
| 28 | + | + | - | + | + | - | - | - |
| 29 | - | - | + | + | + | - | - | - |
| 30 | + | - | + | + | + | - | - | - |
| 31 | - | + | + | + | + | - | - | - |
| 32 | + | + | + | + | + | - | - | - |
| 33 | - | - | - | - | - | + | - | - |
| 34 | + | - | - | - | - | + | - | - |
| 35 | - | + | - | - | - | + | - | - |
| 36 | + | + | - | - | - | + | - | - |
| 37 | - | - | + | - | - | + | - | - |
| 38 | + | - | + | - | - | + | - | - |
| 39 | - | + | + | - | - | + | - | - |
| 40 | + | + | + | - | - | + | - | - |
| 41 | - | - | - | + | - | + | - | - |
| 42 | + | - | - | + | - | + | - | - |
| 43 | - | + | - | + | - | + | - | - |
| 44 | + | + | - | + | - | + | - | - |
| 45 | - | - | + | + | - | + | - | - |
| 46 | + | - | + | + | - | + | - | - |
| 47 | - | + | + | + | - | + | - | - |
| 48 | + | + | + | + | - | + | - | - |
| 49 | - | - | - | - | + | + | - | - |
| 50 | + | - | - | - | + | + | - | - |
| 51 | - | + | - | - | + | + | - | - |
| 52 | + | + | - | - | + | + | - | - |
| 53 | - | - | + | - | + | + | - | - |
| 54 | + | - | + | - | + | + | - | - |
| 55 | - | + | + | - | + | + | - | - |
| 56 | + | + | + | - | + | + | - | - |
| 57 | - | - | - | + | + | + | - | - |
| 58 | + | - | - | + | + | + | - | - |
| 59 | - | + | - | + | + | + | - | - |
| 60 | + | + | - | + | + | + | - | - |
| 61 | - | - | + | + | + | + | - | - |
| 62 | + | - | + | + | + | + | - | - |
| 63 | - | + | + | + | + | + | - | - |
| 64 | + | + | + | + | + | + | - | - |
| 65 | - | - | - | - | - | - | + | - |
| 66 | + | - | - | - | - | - | + | - |
| 67 | - | + | - | - | - | - | + | - |
| 68 | + | + | - | - | - | - | + | - |
| 69 | - | - | + | - | - | - | + | - |
| 70 | + | - | + | - | - | - | + | - |
| 71 | - | + | + | - | - | - | + | - |
| 72 | + | + | + | - | - | - | + | - |
| 73 | - | - | - | + | - | - | + | - |
| 74 | + | - | - | + | - | - | + | - |
| 75 | - | + | - | + | - | - | + | - |
| 76 | + | + | - | + | - | - | + | - |
| 77 | - | - | + | + | - | - | + | - |
| 78 | + | - | + | + | - | - | + | - |
| 79 | - | + | + | + | - | - | + | - |
| 80 | + | + | + | + | - | - | + | - |
| 81 | - | - | - | - | + | - | + | - |
| 82 | + | - | - | - | + | - | + | - |
| 83 | - | + | - | - | + | - | + | - |
| 84 | + | + | - | - | + | - | + | - |
| 85 | - | - | + | - | + | - | + | - |
| 86 | + | - | + | - | + | - | + | - |
| 87 | - | + | + | - | + | - | + | - |
| 88 | + | + | + | - | + | - | + | - |
| 89 | - | - | - | + | + | - | + | - |
| 90 | + | - | - | + | + | - | + | - |
| 91 | - | + | - | + | + | - | + | - |
| 92 | + | + | - | + | + | - | + | - |
| 93 | - | - | + | + | + | - | + | - |
| 94 | + | - | + | + | + | - | + | - |
| 95 | - | + | + | + | + | - | + | - |
| 96 | + | + | + | + | + | - | + | - |
| 97 | - | - | - | - | - | + | + | - |
| 98 | + | - | - | - | - | + | + | - |
| 99 | - | + | - | - | - | + | + | - |
| 100 | + | + | - | - | - | + | + | - |
| 101 | - | - | + | - | - | + | + | - |
| 102 | + | - | + | - | - | + | + | - |
| 103 | - | + | + | - | - | + | + | - |
| 104 | + | + | + | - | - | + | + | - |
| 105 | - | - | - | + | - | + | + | - |
| 106 | + | - | - | + | - | + | + | - |
| 107 | - | + | - | + | - | + | + | - |
| 108 | + | + | - | + | - | + | + | - |
| 109 | - | - | + | + | - | + | + | - |
| 110 | + | - | + | + | - | + | + | - |
| 111 | - | + | + | + | - | + | + | - |
| 112 | + | + | + | + | - | + | + | - |
| 113 | - | - | - | - | + | + | + | - |
| 114 | + | - | - | - | + | + | + | - |
| 115 | - | + | - | - | + | + | + | - |
| 116 | + | + | - | - | + | + | + | - |
| 117 | - | - | + | - | + | + | + | - |
| 118 | + | - | + | - | + | + | + | - |
| 119 | - | + | + | - | + | + | + | - |
| 120 | + | + | + | - | + | + | + | - |
| 121 | - | - | - | + | + | + | + | - |
| 122 | + | - | - | + | + | + | + | - |
| 123 | - | + | - | + | + | + | + | - |
| 124 | + | + | - | + | + | + | + | - |
| 125 | - | - | + | + | + | + | + | - |
| 126 | + | - | + | + | + | + | + | - |
| 127 | - | + | + | + | + | + | + | - |
| 128 | + | + | + | + | + | + | + | - |
| 129 | - | - | - | - | - | - | - | + |
| 130 | + | - | - | - | - | - | - | + |
| 131 | - | + | - | - | - | - | - | + |
| 132 | + | + | - | - | - | - | - | + |
| 133 | - | - | + | - | - | - | - | + |
| 134 | + | - | + | - | - | - | - | + |
| 135 | - | + | + | - | - | - | - | + |
| 136 | + | + | + | - | - | - | - | + |
| 137 | - | - | - | + | - | - | - | + |
| 138 | + | - | - | + | - | - | - | + |
| 139 | - | + | - | + | - | - | - | + |
| 140 | + | + | - | + | - | - | - | + |
| 141 | - | - | + | + | - | - | - | + |
| 142 | + | - | + | + | - | - | - | + |
| 143 | - | + | + | + | - | - | - | + |
| 144 | + | + | + | + | - | - | - | + |
| 145 | - | - | - | - | + | - | - | + |
| 146 | + | - | - | - | + | - | - | + |
| 147 | - | + | - | - | + | - | - | + |
| 148 | + | + | - | - | + | - | - | + |
| 149 | - | - | + | - | + | - | - | + |
| 150 | + | - | + | - | + | - | - | + |
| 151 | - | + | + | - | + | - | - | + |
| 152 | + | + | + | - | + | - | - | + |
| 153 | - | - | - | + | + | - | - | + |
| 154 | + | - | - | + | + | - | - | + |
| 155 | - | + | - | + | + | - | - | + |
| 156 | + | + | - | + | + | - | - | + |
| 157 | - | - | + | + | + | - | - | + |
| 158 | + | - | + | + | + | - | - | + |
| 159 | - | + | + | + | + | - | - | + |
| 160 | + | + | + | + | + | - | - | + |
| 161 | - | - | - | - | - | + | - | + |
| 162 | + | - | - | - | - | + | - | + |
| 163 | - | + | - | - | - | + | - | + |
| 164 | + | + | - | - | - | + | - | + |
| 165 | - | - | + | - | - | + | - | + |
| 166 | + | - | + | - | - | + | - | + |
| 167 | - | + | + | - | - | + | - | + |
| 168 | + | + | + | - | - | + | - | + |
| 169 | - | - | - | + | - | + | - | + |
| 170 | + | - | - | + | - | + | - | + |
| 171 | - | + | - | + | - | + | - | + |
| 172 | + | + | - | + | - | + | - | + |
| 173 | - | - | + | + | - | + | - | + |
| 174 | + | - | + | + | - | + | - | + |
| 175 | - | + | + | + | - | + | - | + |
| 176 | + | + | + | + | - | + | - | + |
| 177 | - | - | - | - | + | + | - | + |
| 178 | + | - | - | - | + | + | - | + |
| 179 | - | + | - | - | + | + | - | + |
| 180 | + | + | - | - | + | + | - | + |
| 181 | - | - | + | - | + | + | - | + |
| 182 | + | - | + | - | + | + | - | + |
| 183 | - | + | + | - | + | + | - | + |
| 184 | + | + | + | - | + | + | - | + |
| 185 | - | - | - | + | + | + | - | + |
| 186 | + | - | - | + | + | + | - | + |
| 187 | - | + | - | + | + | + | - | + |
| 188 | + | + | - | + | + | + | - | + |
| 189 | - | - | + | + | + | + | - | + |
| 190 | + | - | + | + | + | + | - | + |
| 191 | - | + | + | + | + | + | - | + |
| 192 | + | + | + | + | + | + | - | + |
| 193 | - | - | - | - | - | - | + | + |
| 194 | + | - | - | - | - | - | + | + |
| 195 | - | + | - | - | - | - | + | + |
| 196 | + | + | - | - | - | - | + | + |
| 197 | - | - | + | - | - | - | + | + |
| 198 | + | - | + | - | - | - | + | + |
| 199 | - | + | + | - | - | - | + | + |
| 200 | + | + | + | - | - | - | + | + |
| 201 | - | - | - | + | - | - | + | + |
| 202 | + | - | - | + | - | - | + | + |
| 203 | - | + | - | + | - | - | + | + |
| 204 | + | + | - | + | - | - | + | + |
| 205 | - | - | + | + | - | - | + | + |
| 206 | + | - | + | + | - | - | + | + |
| 207 | - | + | + | + | - | - | + | + |
| 208 | + | + | + | + | - | - | + | + |
| 209 | - | - | - | - | + | - | + | + |
| 210 | + | - | - | - | + | - | + | + |
| 211 | - | + | - | - | + | - | + | + |
| 212 | + | + | - | - | + | - | + | + |
| 213 | - | - | + | - | + | - | + | + |
| 214 | + | - | + | - | + | - | + | + |
| 215 | - | + | + | - | + | - | + | + |
| 216 | + | + | + | - | + | - | + | + |
| 217 | - | - | - | + | + | - | + | + |
| 218 | + | - | - | + | + | - | + | + |
| 219 | - | + | - | + | + | - | + | + |
| 220 | + | + | - | + | + | - | + | + |
| 221 | - | - | + | + | + | - | + | + |
| 222 | + | - | + | + | + | - | + | + |
| 223 | - | + | + | + | + | - | + | + |
| 224 | + | + | + | + | + | - | + | + |
| 225 | - | - | - | - | - | + | + | + |
| 226 | + | - | - | - | - | + | + | + |
| 227 | - | + | - | - | - | + | + | + |
| 228 | + | + | - | - | - | + | + | + |
| 229 | - | - | + | - | - | + | + | + |
| 230 | + | - | + | - | - | + | + | + |
| 231 | - | + | + | - | - | + | + | + |
| 232 | + | + | + | - | - | + | + | + |
| 233 | - | - | - | + | - | + | + | + |
| 234 | + | - | - | + | - | + | + | + |
| 235 | - | + | - | + | - | + | + | + |
| 236 | + | + | - | + | - | + | + | + |
| 237 | - | - | + | + | - | + | + | + |
| 238 | + | - | + | + | - | + | + | + |
| 239 | - | + | + | + | - | + | + | + |
| 240 | + | + | + | + | - | + | + | + |
| 241 | - | - | - | - | + | + | + | + |
| 242 | + | - | - | - | + | + | + | + |
| 243 | - | + | - | - | + | + | + | + |
| 244 | + | + | - | - | + | + | + | + |
| 245 | - | - | + | - | + | + | + | + |
| 246 | + | - | + | - | + | + | + | + |
| 247 | - | + | + | - | + | + | + | + |
| 248 | + | + | + | - | + | + | + | + |
| 249 | - | - | - | + | + | + | + | + |
| 250 | + | - | - | + | + | + | + | + |
| 251 | - | + | - | + | + | + | + | + |
| 252 | + | + | - | + | + | + | + | + |
| 253 | - | - | + | + | + | + | + | + |
| 254 | + | - | + | + | + | + | + | + |
| 255 | - | + | + | + | + | + | + | + |
| 256 | + | + | + | + | + | + | + | + |

**Supplementary Table 3:** Tabulation of number of unique patterns (PAT) observed (1-256) in each of the 22 study herds (H1-H22).

| **PAT** | | **H1** | **H2** | **H3** | **H4** | **H5** | **H6** | **H7** | **H8** | **H9** | **H**  **10** | **H**  **11** | **H**  **12** | **H**  **13** | **H**  **14** | **H**  **15** | **H**  **16** | **H**  **17** | **H**  **18** | **H**  **19** | **H**  **20** | **H**  **21** | **H**  **22** |
| --- | --- | --- | --- | --- | --- | --- | --- | --- | --- | --- | --- | --- | --- | --- | --- | --- | --- | --- | --- | --- | --- | --- | --- |
| 1 | 3 | | 0 | 3 | 2 | 3 | 2 | 0 | 22 | 8 | 5 | 1 | 4 | 13 | 5 | 3 | 7 | 0 | 15 | 13 | 4 | 2 | 3 |
| 2 | 1 | | 0 | 0 | 2 | 0 | 0 | 0 | 1 | 1 | 1 | 0 | 0 | 1 | 1 | 0 | 0 | 0 | 0 | 0 | 0 | 0 | 0 |
| 3 | 1 | | 0 | 0 | 0 | 0 | 1 | 0 | 1 | 3 | 0 | 0 | 1 | 1 | 1 | 0 | 0 | 0 | 2 | 0 | 0 | 1 | 0 |
| 4 | 0 | | 1 | 0 | 0 | 0 | 0 | 0 | 0 | 0 | 0 | 0 | 1 | 0 | 0 | 1 | 0 | 0 | 3 | 0 | 0 | 1 | 0 |
| 5 | 1 | | 0 | 0 | 0 | 0 | 0 | 0 | 0 | 0 | 0 | 0 | 0 | 1 | 2 | 0 | 0 | 0 | 1 | 0 | 0 | 0 | 0 |
| 6 | 0 | | 0 | 0 | 0 | 0 | 0 | 0 | 0 | 0 | 0 | 0 | 0 | 0 | 0 | 0 | 0 | 0 | 0 | 0 | 0 | 0 | 0 |
| 7 | 0 | | 1 | 0 | 1 | 0 | 0 | 1 | 0 | 1 | 0 | 0 | 0 | 0 | 0 | 0 | 0 | 0 | 0 | 0 | 0 | 0 | 0 |
| 8 | 0 | | 3 | 0 | 0 | 0 | 0 | 0 | 0 | 0 | 0 | 0 | 0 | 1 | 0 | 0 | 0 | 0 | 0 | 0 | 0 | 1 | 0 |
| 9 | 3 | | 0 | 0 | 0 | 1 | 0 | 0 | 4 | 0 | 0 | 0 | 0 | 0 | 1 | 0 | 0 | 0 | 2 | 3 | 0 | 0 | 0 |
| 10 | 0 | | 0 | 0 | 0 | 0 | 0 | 0 | 0 | 0 | 0 | 0 | 0 | 0 | 0 | 0 | 0 | 0 | 1 | 0 | 0 | 1 | 0 |
| 11 | 0 | | 0 | 0 | 0 | 0 | 0 | 0 | 0 | 0 | 0 | 0 | 0 | 0 | 0 | 2 | 0 | 0 | 0 | 1 | 0 | 0 | 0 |
| 12 | 1 | | 0 | 0 | 0 | 0 | 1 | 0 | 0 | 0 | 0 | 0 | 0 | 0 | 0 | 0 | 0 | 0 | 0 | 0 | 0 | 1 | 0 |
| 13 | 0 | | 1 | 0 | 0 | 0 | 0 | 0 | 0 | 1 | 0 | 0 | 0 | 0 | 1 | 0 | 0 | 0 | 0 | 0 | 0 | 0 | 0 |
| 14 | 1 | | 0 | 0 | 0 | 0 | 0 | 0 | 0 | 0 | 0 | 0 | 0 | 0 | 0 | 0 | 0 | 0 | 0 | 0 | 0 | 0 | 0 |
| 15 | 0 | | 1 | 0 | 0 | 0 | 0 | 0 | 0 | 0 | 0 | 0 | 0 | 1 | 0 | 0 | 0 | 0 | 0 | 1 | 0 | 0 | 0 |
| 16 | 0 | | 2 | 0 | 1 | 0 | 1 | 0 | 0 | 0 | 0 | 1 | 0 | 1 | 0 | 0 | 0 | 0 | 0 | 0 | 0 | 1 | 0 |
| 17 | 0 | | 0 | 0 | 0 | 0 | 0 | 0 | 0 | 0 | 0 | 0 | 0 | 0 | 0 | 0 | 0 | 0 | 0 | 0 | 0 | 0 | 0 |
| 18 | 0 | | 0 | 0 | 0 | 0 | 0 | 0 | 0 | 0 | 0 | 0 | 0 | 0 | 0 | 0 | 0 | 0 | 0 | 0 | 0 | 0 | 0 |
| 19 | 0 | | 0 | 0 | 0 | 0 | 0 | 0 | 0 | 0 | 0 | 0 | 0 | 0 | 0 | 0 | 0 | 0 | 0 | 0 | 0 | 0 | 0 |
| 20 | 0 | | 0 | 0 | 0 | 0 | 0 | 0 | 0 | 0 | 0 | 0 | 0 | 0 | 0 | 0 | 0 | 0 | 0 | 0 | 0 | 0 | 0 |
| 21 | 0 | | 0 | 0 | 0 | 0 | 0 | 0 | 0 | 0 | 0 | 0 | 0 | 0 | 0 | 0 | 0 | 0 | 0 | 0 | 0 | 0 | 0 |
| 22 | 0 | | 0 | 0 | 0 | 0 | 0 | 0 | 0 | 0 | 0 | 0 | 0 | 0 | 0 | 0 | 0 | 0 | 0 | 0 | 0 | 0 | 0 |
| 23 | 0 | | 0 | 0 | 0 | 0 | 0 | 0 | 0 | 0 | 0 | 0 | 0 | 0 | 0 | 0 | 0 | 0 | 0 | 0 | 0 | 0 | 0 |
| 24 | 0 | | 0 | 0 | 0 | 0 | 0 | 0 | 0 | 0 | 0 | 0 | 0 | 0 | 0 | 0 | 0 | 0 | 0 | 0 | 0 | 0 | 0 |
| 25 | 0 | | 0 | 0 | 0 | 0 | 0 | 0 | 0 | 0 | 0 | 0 | 0 | 0 | 0 | 0 | 0 | 0 | 0 | 0 | 0 | 0 | 0 |
| 26 | 0 | | 0 | 0 | 0 | 0 | 0 | 0 | 0 | 0 | 0 | 0 | 0 | 0 | 0 | 0 | 0 | 0 | 0 | 0 | 0 | 0 | 0 |
| 27 | 0 | | 0 | 0 | 0 | 0 | 0 | 0 | 0 | 0 | 0 | 0 | 0 | 0 | 0 | 0 | 0 | 0 | 0 | 0 | 0 | 0 | 0 |
| 28 | 0 | | 0 | 0 | 0 | 0 | 0 | 0 | 0 | 0 | 0 | 0 | 0 | 0 | 0 | 0 | 0 | 0 | 0 | 0 | 0 | 0 | 0 |
| 29 | 0 | | 0 | 0 | 0 | 0 | 0 | 0 | 0 | 0 | 0 | 0 | 0 | 0 | 0 | 0 | 0 | 0 | 0 | 0 | 0 | 0 | 0 |
| 30 | 0 | | 0 | 0 | 0 | 0 | 0 | 0 | 0 | 0 | 0 | 0 | 0 | 0 | 0 | 0 | 0 | 0 | 0 | 0 | 0 | 0 | 0 |
| 31 | 0 | | 0 | 0 | 0 | 0 | 0 | 0 | 0 | 0 | 0 | 0 | 0 | 0 | 0 | 0 | 0 | 0 | 0 | 0 | 0 | 0 | 0 |
| 32 | 0 | | 0 | 0 | 0 | 0 | 0 | 0 | 0 | 0 | 0 | 0 | 0 | 0 | 0 | 0 | 0 | 0 | 0 | 0 | 0 | 0 | 0 |
| 33 | 1 | | 0 | 0 | 0 | 1 | 0 | 0 | 1 | 1 | 0 | 0 | 1 | 0 | 0 | 0 | 0 | 0 | 1 | 1 | 0 | 0 | 0 |
| 34 | 0 | | 0 | 0 | 0 | 0 | 0 | 0 | 0 | 0 | 0 | 0 | 0 | 0 | 0 | 0 | 0 | 0 | 0 | 0 | 0 | 1 | 0 |
| 35 | 0 | | 0 | 0 | 0 | 0 | 0 | 0 | 0 | 0 | 0 | 0 | 0 | 1 | 0 | 0 | 0 | 0 | 0 | 0 | 0 | 0 | 0 |
| 36 | 0 | | 0 | 0 | 0 | 0 | 0 | 0 | 0 | 0 | 0 | 0 | 0 | 0 | 0 | 0 | 0 | 0 | 0 | 0 | 0 | 0 | 0 |
| 37 | 0 | | 0 | 0 | 0 | 0 | 0 | 0 | 0 | 0 | 0 | 0 | 0 | 2 | 0 | 0 | 0 | 0 | 0 | 0 | 0 | 1 | 0 |
| 38 | 0 | | 0 | 0 | 0 | 0 | 0 | 0 | 0 | 0 | 0 | 0 | 0 | 0 | 0 | 0 | 0 | 0 | 0 | 0 | 0 | 0 | 0 |
| 39 | 0 | | 0 | 0 | 0 | 0 | 0 | 0 | 0 | 1 | 0 | 0 | 0 | 0 | 0 | 0 | 0 | 0 | 2 | 0 | 0 | 0 | 0 |
| 40 | 0 | | 0 | 0 | 0 | 0 | 0 | 0 | 0 | 0 | 0 | 0 | 0 | 0 | 0 | 0 | 0 | 0 | 1 | 0 | 0 | 0 | 0 |
| 41 | 0 | | 0 | 0 | 0 | 0 | 1 | 0 | 4 | 0 | 1 | 2 | 0 | 0 | 0 | 0 | 0 | 0 | 2 | 1 | 0 | 0 | 0 |
| 42 | 0 | | 0 | 0 | 0 | 0 | 0 | 0 | 1 | 0 | 0 | 0 | 0 | 1 | 0 | 0 | 0 | 0 | 0 | 0 | 0 | 0 | 0 |
| 43 | 0 | | 0 | 0 | 0 | 0 | 0 | 0 | 0 | 0 | 0 | 0 | 1 | 0 | 0 | 0 | 0 | 0 | 0 | 0 | 0 | 0 | 0 |
| 44 | 0 | | 1 | 0 | 0 | 0 | 0 | 0 | 0 | 0 | 0 | 1 | 0 | 0 | 0 | 0 | 0 | 0 | 1 | 0 | 0 | 0 | 0 |
| 45 | 0 | | 0 | 0 | 0 | 0 | 0 | 0 | 0 | 0 | 0 | 0 | 0 | 0 | 0 | 0 | 0 | 0 | 0 | 1 | 0 | 0 | 1 |
| 46 | 0 | | 0 | 0 | 0 | 0 | 0 | 0 | 0 | 0 | 0 | 0 | 0 | 1 | 0 | 0 | 0 | 0 | 0 | 0 | 0 | 0 | 0 |
| 47 | 0 | | 0 | 0 | 0 | 0 | 1 | 0 | 0 | 0 | 0 | 0 | 0 | 0 | 0 | 0 | 0 | 0 | 0 | 0 | 0 | 0 | 0 |
| 48 | 0 | | 2 | 0 | 0 | 0 | 0 | 0 | 0 | 0 | 0 | 4 | 0 | 0 | 0 | 1 | 0 | 0 | 2 | 0 | 1 | 0 | 0 |
| 49 | 0 | | 0 | 0 | 0 | 0 | 0 | 0 | 0 | 0 | 0 | 0 | 0 | 0 | 0 | 0 | 0 | 0 | 0 | 0 | 0 | 0 | 0 |
| 50 | 0 | | 0 | 0 | 0 | 0 | 0 | 0 | 0 | 0 | 0 | 0 | 0 | 0 | 0 | 0 | 0 | 0 | 0 | 0 | 0 | 0 | 0 |
| 51 | 0 | | 0 | 0 | 0 | 0 | 0 | 0 | 0 | 0 | 0 | 0 | 0 | 0 | 0 | 0 | 0 | 0 | 0 | 0 | 0 | 0 | 0 |
| 52 | 0 | | 0 | 0 | 0 | 0 | 0 | 0 | 0 | 0 | 0 | 0 | 0 | 0 | 0 | 0 | 0 | 0 | 0 | 0 | 0 | 0 | 0 |
| 53 | 0 | | 0 | 0 | 0 | 0 | 0 | 0 | 0 | 0 | 0 | 0 | 0 | 0 | 0 | 0 | 0 | 0 | 0 | 0 | 0 | 0 | 0 |
| 54 | 0 | | 0 | 0 | 0 | 0 | 0 | 0 | 0 | 0 | 0 | 0 | 0 | 0 | 0 | 0 | 0 | 0 | 0 | 0 | 0 | 0 | 0 |
| 55 | 0 | | 0 | 0 | 0 | 0 | 0 | 0 | 0 | 0 | 0 | 0 | 0 | 0 | 0 | 0 | 0 | 0 | 0 | 0 | 0 | 0 | 0 |
| 56 | 0 | | 0 | 0 | 0 | 0 | 0 | 0 | 0 | 0 | 0 | 0 | 0 | 0 | 0 | 0 | 0 | 0 | 0 | 0 | 0 | 0 | 0 |
| 57 | 0 | | 0 | 0 | 0 | 0 | 0 | 0 | 0 | 0 | 0 | 2 | 0 | 0 | 0 | 0 | 0 | 0 | 0 | 0 | 0 | 0 | 0 |
| 58 | 0 | | 0 | 0 | 0 | 0 | 0 | 0 | 0 | 0 | 0 | 1 | 0 | 0 | 0 | 0 | 0 | 0 | 0 | 0 | 0 | 0 | 0 |
| 59 | 0 | | 0 | 0 | 0 | 0 | 0 | 0 | 0 | 0 | 0 | 1 | 0 | 0 | 0 | 0 | 0 | 0 | 0 | 0 | 0 | 0 | 0 |
| 60 | 0 | | 0 | 0 | 0 | 0 | 0 | 0 | 0 | 0 | 0 | 0 | 0 | 0 | 0 | 0 | 0 | 0 | 1 | 0 | 0 | 0 | 0 |
| 61 | 0 | | 0 | 0 | 0 | 0 | 0 | 0 | 0 | 0 | 0 | 0 | 0 | 0 | 0 | 0 | 0 | 0 | 0 | 0 | 0 | 0 | 0 |
| 62 | 0 | | 0 | 0 | 0 | 0 | 0 | 0 | 0 | 0 | 0 | 0 | 0 | 0 | 0 | 0 | 0 | 0 | 1 | 0 | 0 | 0 | 0 |
| 63 | 0 | | 0 | 0 | 0 | 0 | 0 | 0 | 0 | 0 | 0 | 2 | 0 | 0 | 0 | 0 | 1 | 0 | 0 | 0 | 0 | 0 | 0 |
| 64 | 0 | | 2 | 0 | 0 | 0 | 1 | 1 | 0 | 0 | 0 | 3 | 0 | 0 | 0 | 0 | 0 | 0 | 0 | 1 | 0 | 0 | 0 |
| 65 | 0 | | 0 | 0 | 0 | 0 | 0 | 0 | 2 | 1 | 0 | 0 | 0 | 1 | 0 | 0 | 0 | 0 | 2 | 1 | 0 | 0 | 0 |
| 66 | 0 | | 0 | 0 | 0 | 0 | 0 | 0 | 0 | 0 | 0 | 0 | 0 | 0 | 0 | 0 | 0 | 0 | 0 | 0 | 0 | 0 | 0 |
| 67 | 0 | | 0 | 0 | 0 | 0 | 0 | 0 | 0 | 0 | 0 | 0 | 0 | 0 | 0 | 0 | 0 | 0 | 0 | 0 | 0 | 0 | 0 |
| 68 | 0 | | 0 | 0 | 0 | 0 | 0 | 0 | 0 | 0 | 0 | 0 | 0 | 0 | 0 | 0 | 0 | 0 | 0 | 0 | 0 | 0 | 0 |
| 69 | 0 | | 0 | 0 | 0 | 0 | 0 | 0 | 0 | 0 | 0 | 0 | 0 | 0 | 0 | 0 | 0 | 0 | 1 | 0 | 0 | 0 | 0 |
| 70 | 0 | | 0 | 0 | 0 | 0 | 0 | 0 | 0 | 0 | 0 | 0 | 0 | 0 | 0 | 0 | 0 | 0 | 0 | 0 | 0 | 0 | 0 |
| 71 | 0 | | 0 | 0 | 0 | 0 | 0 | 0 | 0 | 0 | 0 | 0 | 0 | 0 | 0 | 0 | 0 | 0 | 0 | 0 | 0 | 0 | 0 |
| 72 | 0 | | 0 | 0 | 0 | 0 | 0 | 0 | 0 | 0 | 0 | 0 | 0 | 0 | 0 | 0 | 0 | 0 | 0 | 0 | 0 | 0 | 0 |
| 73 | 0 | | 0 | 0 | 0 | 0 | 0 | 0 | 0 | 0 | 0 | 0 | 0 | 0 | 0 | 0 | 0 | 0 | 0 | 0 | 0 | 0 | 0 |
| 74 | 0 | | 0 | 0 | 0 | 0 | 0 | 0 | 1 | 0 | 0 | 0 | 0 | 0 | 0 | 0 | 0 | 0 | 0 | 0 | 0 | 0 | 0 |
| 75 | 0 | | 0 | 0 | 0 | 0 | 0 | 0 | 0 | 0 | 0 | 0 | 0 | 0 | 0 | 0 | 0 | 0 | 1 | 1 | 0 | 0 | 0 |
| 76 | 0 | | 0 | 0 | 0 | 0 | 0 | 0 | 0 | 0 | 0 | 0 | 0 | 0 | 0 | 0 | 0 | 0 | 0 | 1 | 0 | 0 | 0 |
| 77 | 0 | | 0 | 0 | 0 | 0 | 0 | 0 | 0 | 0 | 0 | 0 | 0 | 0 | 0 | 0 | 0 | 0 | 0 | 0 | 0 | 0 | 0 |
| 78 | 0 | | 0 | 0 | 0 | 0 | 0 | 0 | 0 | 0 | 1 | 0 | 0 | 0 | 0 | 0 | 0 | 0 | 0 | 1 | 0 | 0 | 0 |
| 79 | 0 | | 0 | 0 | 0 | 0 | 0 | 0 | 0 | 0 | 0 | 0 | 0 | 0 | 0 | 0 | 0 | 0 | 0 | 0 | 0 | 0 | 0 |
| 80 | 0 | | 0 | 0 | 0 | 0 | 0 | 0 | 0 | 0 | 0 | 0 | 0 | 0 | 0 | 0 | 0 | 0 | 1 | 0 | 0 | 0 | 0 |
| 81 | 0 | | 0 | 0 | 0 | 0 | 0 | 0 | 0 | 0 | 0 | 0 | 0 | 0 | 0 | 0 | 0 | 0 | 0 | 0 | 0 | 0 | 0 |
| 82 | 0 | | 0 | 0 | 0 | 0 | 0 | 0 | 0 | 0 | 0 | 0 | 0 | 0 | 0 | 0 | 0 | 0 | 0 | 0 | 0 | 0 | 0 |
| 83 | 0 | | 0 | 0 | 0 | 0 | 0 | 0 | 0 | 0 | 0 | 0 | 0 | 0 | 0 | 0 | 0 | 0 | 0 | 0 | 0 | 0 | 0 |
| 84 | 0 | | 0 | 0 | 0 | 0 | 0 | 0 | 0 | 0 | 0 | 0 | 0 | 0 | 0 | 0 | 0 | 0 | 0 | 0 | 0 | 0 | 0 |
| 85 | 0 | | 0 | 0 | 0 | 0 | 0 | 0 | 0 | 0 | 0 | 0 | 0 | 0 | 0 | 0 | 0 | 0 | 0 | 0 | 0 | 0 | 0 |
| 86 | 0 | | 0 | 0 | 0 | 0 | 0 | 0 | 0 | 0 | 0 | 0 | 0 | 0 | 0 | 0 | 0 | 0 | 0 | 0 | 0 | 0 | 0 |
| 87 | 0 | | 0 | 0 | 0 | 0 | 0 | 0 | 0 | 0 | 0 | 0 | 0 | 0 | 0 | 0 | 0 | 0 | 0 | 0 | 0 | 0 | 0 |
| 88 | 0 | | 0 | 0 | 0 | 0 | 0 | 0 | 0 | 0 | 0 | 0 | 0 | 0 | 0 | 0 | 0 | 0 | 0 | 0 | 0 | 0 | 0 |
| 89 | 0 | | 0 | 0 | 0 | 0 | 0 | 0 | 0 | 0 | 0 | 0 | 0 | 0 | 0 | 0 | 0 | 0 | 0 | 0 | 0 | 0 | 0 |
| 90 | 0 | | 0 | 0 | 0 | 0 | 0 | 0 | 0 | 0 | 0 | 0 | 0 | 0 | 0 | 0 | 0 | 0 | 0 | 0 | 0 | 0 | 0 |
| 91 | 0 | | 0 | 0 | 0 | 0 | 0 | 0 | 0 | 0 | 0 | 0 | 0 | 0 | 0 | 0 | 0 | 0 | 0 | 0 | 0 | 0 | 0 |
| 92 | 0 | | 0 | 0 | 0 | 0 | 0 | 0 | 0 | 0 | 0 | 0 | 0 | 0 | 0 | 0 | 0 | 0 | 0 | 0 | 0 | 0 | 0 |
| 93 | 0 | | 0 | 0 | 0 | 0 | 0 | 0 | 0 | 0 | 0 | 0 | 0 | 0 | 0 | 0 | 0 | 0 | 0 | 0 | 0 | 0 | 0 |
| 94 | 0 | | 0 | 0 | 0 | 0 | 0 | 0 | 0 | 0 | 0 | 0 | 0 | 0 | 0 | 0 | 0 | 0 | 0 | 0 | 0 | 0 | 0 |
| 95 | 0 | | 0 | 0 | 0 | 0 | 0 | 0 | 0 | 0 | 0 | 0 | 0 | 0 | 0 | 0 | 0 | 0 | 0 | 0 | 0 | 0 | 0 |
| 96 | 0 | | 0 | 0 | 0 | 0 | 0 | 0 | 0 | 0 | 0 | 0 | 0 | 0 | 0 | 0 | 0 | 0 | 0 | 0 | 0 | 0 | 0 |
| 97 | 0 | | 0 | 0 | 0 | 0 | 1 | 0 | 0 | 0 | 0 | 0 | 0 | 0 | 0 | 0 | 0 | 0 | 0 | 0 | 0 | 0 | 0 |
| 98 | 0 | | 0 | 0 | 0 | 0 | 0 | 0 | 0 | 0 | 0 | 0 | 0 | 0 | 0 | 0 | 0 | 0 | 0 | 0 | 0 | 0 | 0 |
| 99 | 0 | | 0 | 0 | 0 | 0 | 0 | 0 | 0 | 0 | 0 | 0 | 0 | 0 | 0 | 0 | 0 | 0 | 0 | 0 | 0 | 0 | 0 |
| 100 | 0 | | 0 | 0 | 0 | 0 | 0 | 0 | 0 | 0 | 0 | 0 | 0 | 0 | 0 | 0 | 0 | 0 | 0 | 0 | 0 | 0 | 0 |
| 101 | 0 | | 0 | 0 | 0 | 0 | 0 | 0 | 0 | 0 | 0 | 0 | 0 | 0 | 0 | 0 | 0 | 0 | 0 | 0 | 0 | 0 | 0 |
| 102 | 0 | | 0 | 0 | 0 | 0 | 0 | 0 | 0 | 0 | 0 | 0 | 0 | 0 | 0 | 0 | 0 | 0 | 0 | 0 | 0 | 0 | 0 |
| 103 | 0 | | 0 | 0 | 0 | 0 | 0 | 0 | 0 | 0 | 0 | 0 | 0 | 0 | 0 | 0 | 0 | 0 | 0 | 0 | 0 | 0 | 0 |
| 104 | 0 | | 0 | 0 | 0 | 0 | 0 | 0 | 0 | 0 | 0 | 0 | 0 | 0 | 0 | 0 | 0 | 0 | 0 | 0 | 0 | 0 | 0 |
| 105 | 0 | | 0 | 0 | 0 | 0 | 1 | 0 | 0 | 0 | 0 | 0 | 0 | 0 | 0 | 2 | 0 | 0 | 0 | 3 | 1 | 1 | 1 |
| 106 | 0 | | 0 | 0 | 0 | 0 | 0 | 0 | 0 | 0 | 0 | 0 | 0 | 0 | 0 | 0 | 0 | 0 | 0 | 0 | 0 | 0 | 0 |
| 107 | 0 | | 0 | 0 | 0 | 0 | 0 | 0 | 0 | 0 | 0 | 0 | 0 | 0 | 0 | 0 | 0 | 0 | 1 | 0 | 1 | 0 | 0 |
| 108 | 0 | | 0 | 0 | 0 | 0 | 0 | 0 | 0 | 0 | 0 | 0 | 0 | 1 | 0 | 1 | 0 | 0 | 0 | 0 | 0 | 0 | 0 |
| 109 | 0 | | 0 | 0 | 0 | 0 | 0 | 1 | 0 | 0 | 0 | 2 | 0 | 0 | 0 | 0 | 0 | 1 | 1 | 0 | 0 | 0 | 0 |
| 110 | 0 | | 0 | 0 | 0 | 0 | 0 | 0 | 0 | 0 | 0 | 0 | 0 | 0 | 0 | 0 | 0 | 0 | 0 | 0 | 0 | 0 | 0 |
| 111 | 0 | | 1 | 0 | 0 | 0 | 1 | 0 | 0 | 0 | 0 | 0 | 0 | 0 | 0 | 1 | 0 | 1 | 0 | 1 | 0 | 0 | 0 |
| 112 | 0 | | 4 | 0 | 0 | 0 | 0 | 3 | 0 | 0 | 0 | 1 | 0 | 1 | 0 | 1 | 2 | 1 | 2 | 1 | 0 | 1 | 0 |
| 113 | 0 | | 0 | 0 | 0 | 0 | 0 | 0 | 0 | 0 | 0 | 0 | 0 | 0 | 0 | 0 | 0 | 0 | 0 | 0 | 0 | 0 | 0 |
| 114 | 0 | | 0 | 0 | 0 | 0 | 0 | 0 | 0 | 0 | 0 | 0 | 0 | 0 | 0 | 0 | 0 | 0 | 0 | 0 | 0 | 0 | 0 |
| 115 | 0 | | 0 | 0 | 0 | 0 | 0 | 0 | 0 | 0 | 0 | 0 | 0 | 0 | 0 | 0 | 0 | 0 | 0 | 0 | 0 | 0 | 0 |
| 116 | 0 | | 0 | 0 | 0 | 0 | 0 | 0 | 0 | 0 | 0 | 0 | 0 | 0 | 0 | 0 | 0 | 0 | 0 | 0 | 0 | 0 | 0 |
| 117 | 0 | | 0 | 0 | 0 | 0 | 0 | 0 | 0 | 0 | 0 | 0 | 0 | 0 | 0 | 0 | 0 | 0 | 0 | 0 | 0 | 0 | 0 |
| 118 | 0 | | 0 | 0 | 0 | 0 | 0 | 0 | 0 | 0 | 0 | 0 | 0 | 0 | 0 | 0 | 0 | 0 | 0 | 0 | 0 | 0 | 0 |
| 119 | 0 | | 0 | 0 | 0 | 0 | 0 | 0 | 0 | 0 | 0 | 0 | 0 | 0 | 0 | 0 | 0 | 0 | 0 | 0 | 0 | 0 | 0 |
| 120 | 0 | | 0 | 0 | 0 | 0 | 0 | 0 | 0 | 0 | 0 | 0 | 0 | 0 | 0 | 0 | 0 | 0 | 0 | 0 | 0 | 0 | 0 |
| 121 | 0 | | 0 | 0 | 0 | 0 | 1 | 0 | 0 | 0 | 0 | 2 | 0 | 0 | 0 | 0 | 0 | 0 | 0 | 0 | 0 | 0 | 0 |
| 122 | 0 | | 0 | 0 | 0 | 0 | 0 | 0 | 0 | 0 | 0 | 1 | 0 | 0 | 0 | 0 | 0 | 1 | 0 | 0 | 0 | 0 | 0 |
| 123 | 0 | | 0 | 0 | 0 | 0 | 0 | 0 | 0 | 0 | 0 | 1 | 0 | 0 | 0 | 0 | 0 | 1 | 0 | 0 | 0 | 0 | 0 |
| 124 | 0 | | 0 | 0 | 0 | 0 | 1 | 0 | 0 | 0 | 0 | 0 | 0 | 0 | 0 | 0 | 0 | 0 | 0 | 0 | 0 | 0 | 0 |
| 125 | 0 | | 0 | 0 | 0 | 0 | 0 | 0 | 0 | 0 | 0 | 0 | 0 | 0 | 0 | 0 | 0 | 0 | 0 | 0 | 1 | 0 | 0 |
| 126 | 0 | | 0 | 0 | 0 | 0 | 1 | 1 | 0 | 0 | 0 | 0 | 0 | 0 | 0 | 0 | 0 | 2 | 0 | 0 | 0 | 0 | 0 |
| 127 | 0 | | 0 | 0 | 0 | 0 | 1 | 0 | 2 | 0 | 0 | 2 | 0 | 1 | 0 | 0 | 1 | 1 | 1 | 1 | 0 | 0 | 0 |
| 128 | 0 | | 4 | 0 | 0 | 0 | 3 | 8 | 0 | 0 | 0 | 17 | 0 | 0 | 0 | 0 | 3 | 19 | 0 | 6 | 0 | 2 | 0 |
| 129 | 0 | | 0 | 0 | 0 | 0 | 0 | 0 | 0 | 0 | 0 | 0 | 0 | 0 | 0 | 1 | 0 | 0 | 0 | 0 | 0 | 0 | 0 |
| 130 | 0 | | 0 | 0 | 0 | 0 | 0 | 0 | 0 | 0 | 0 | 0 | 0 | 0 | 0 | 0 | 0 | 0 | 0 | 0 | 0 | 0 | 0 |
| 131 | 0 | | 0 | 0 | 0 | 0 | 0 | 0 | 0 | 0 | 0 | 0 | 0 | 0 | 0 | 0 | 0 | 0 | 0 | 0 | 0 | 0 | 0 |
| 132 | 0 | | 0 | 0 | 0 | 0 | 0 | 0 | 0 | 0 | 0 | 0 | 0 | 0 | 0 | 0 | 0 | 0 | 0 | 0 | 0 | 0 | 0 |
| 133 | 0 | | 0 | 0 | 0 | 0 | 0 | 0 | 0 | 0 | 0 | 0 | 0 | 0 | 0 | 0 | 0 | 0 | 0 | 0 | 0 | 0 | 0 |
| 134 | 0 | | 0 | 0 | 0 | 0 | 0 | 0 | 0 | 0 | 0 | 0 | 0 | 0 | 0 | 0 | 0 | 0 | 0 | 0 | 0 | 0 | 0 |
| 135 | 0 | | 0 | 0 | 0 | 0 | 0 | 0 | 0 | 0 | 0 | 0 | 0 | 0 | 0 | 0 | 0 | 0 | 0 | 0 | 0 | 0 | 0 |
| 136 | 0 | | 0 | 0 | 0 | 0 | 0 | 0 | 0 | 0 | 0 | 0 | 0 | 0 | 0 | 0 | 0 | 0 | 0 | 0 | 0 | 0 | 0 |
| 137 | 0 | | 0 | 0 | 0 | 0 | 0 | 0 | 0 | 0 | 0 | 0 | 0 | 0 | 0 | 0 | 0 | 0 | 0 | 0 | 0 | 0 | 0 |
| 138 | 0 | | 0 | 0 | 0 | 0 | 0 | 0 | 0 | 0 | 0 | 0 | 0 | 0 | 0 | 0 | 0 | 0 | 0 | 0 | 0 | 0 | 0 |
| 139 | 0 | | 0 | 0 | 0 | 0 | 0 | 0 | 0 | 0 | 0 | 0 | 0 | 0 | 0 | 0 | 0 | 0 | 0 | 0 | 0 | 0 | 0 |
| 140 | 0 | | 0 | 0 | 0 | 0 | 0 | 0 | 0 | 0 | 0 | 0 | 0 | 0 | 0 | 0 | 0 | 0 | 0 | 0 | 0 | 0 | 0 |
| 141 | 0 | | 0 | 0 | 0 | 0 | 0 | 0 | 0 | 0 | 0 | 0 | 0 | 0 | 0 | 0 | 0 | 0 | 0 | 0 | 0 | 0 | 0 |
| 142 | 0 | | 0 | 0 | 0 | 0 | 0 | 0 | 0 | 0 | 0 | 0 | 0 | 0 | 0 | 0 | 0 | 0 | 0 | 0 | 0 | 0 | 0 |
| 143 | 0 | | 0 | 0 | 0 | 0 | 0 | 0 | 0 | 0 | 0 | 0 | 0 | 0 | 0 | 0 | 0 | 0 | 0 | 0 | 0 | 0 | 0 |
| 144 | 0 | | 0 | 0 | 0 | 0 | 0 | 0 | 0 | 0 | 0 | 0 | 0 | 0 | 0 | 0 | 0 | 0 | 0 | 0 | 0 | 0 | 0 |
| 145 | 0 | | 0 | 0 | 0 | 0 | 0 | 0 | 0 | 0 | 0 | 0 | 0 | 0 | 0 | 0 | 0 | 0 | 0 | 0 | 0 | 0 | 0 |
| 146 | 0 | | 0 | 0 | 0 | 0 | 0 | 0 | 0 | 0 | 0 | 0 | 0 | 0 | 0 | 0 | 0 | 0 | 0 | 0 | 0 | 0 | 0 |
| 147 | 0 | | 0 | 0 | 0 | 0 | 0 | 0 | 0 | 0 | 0 | 0 | 0 | 0 | 0 | 0 | 0 | 0 | 0 | 0 | 0 | 0 | 0 |
| 148 | 0 | | 0 | 0 | 0 | 0 | 0 | 0 | 0 | 0 | 0 | 0 | 0 | 0 | 0 | 0 | 0 | 0 | 0 | 0 | 0 | 0 | 0 |
| 149 | 0 | | 0 | 0 | 0 | 0 | 0 | 0 | 0 | 0 | 0 | 0 | 0 | 0 | 0 | 0 | 0 | 0 | 0 | 0 | 0 | 0 | 0 |
| 150 | 0 | | 0 | 0 | 0 | 0 | 0 | 0 | 0 | 0 | 0 | 0 | 0 | 0 | 0 | 0 | 0 | 0 | 0 | 0 | 0 | 0 | 0 |
| 151 | 0 | | 0 | 0 | 0 | 0 | 0 | 0 | 0 | 0 | 0 | 0 | 0 | 0 | 0 | 0 | 0 | 0 | 0 | 0 | 0 | 0 | 0 |
| 152 | 0 | | 0 | 0 | 0 | 0 | 0 | 0 | 0 | 0 | 0 | 0 | 0 | 0 | 0 | 0 | 0 | 0 | 0 | 0 | 0 | 0 | 0 |
| 153 | 0 | | 0 | 0 | 0 | 0 | 0 | 0 | 0 | 0 | 0 | 0 | 0 | 0 | 0 | 0 | 0 | 0 | 0 | 0 | 0 | 0 | 0 |
| 154 | 0 | | 0 | 0 | 0 | 0 | 0 | 0 | 0 | 0 | 0 | 0 | 0 | 0 | 0 | 0 | 0 | 0 | 0 | 0 | 0 | 0 | 0 |
| 155 | 0 | | 0 | 0 | 0 | 0 | 0 | 0 | 0 | 0 | 0 | 0 | 0 | 0 | 0 | 0 | 0 | 0 | 0 | 0 | 0 | 0 | 0 |
| 156 | 0 | | 0 | 0 | 0 | 0 | 0 | 0 | 0 | 0 | 0 | 0 | 0 | 0 | 0 | 0 | 0 | 0 | 0 | 0 | 0 | 0 | 0 |
| 157 | 0 | | 0 | 0 | 0 | 0 | 0 | 0 | 0 | 0 | 0 | 0 | 0 | 0 | 0 | 0 | 0 | 0 | 0 | 0 | 0 | 0 | 0 |
| 158 | 0 | | 0 | 0 | 0 | 0 | 0 | 0 | 0 | 0 | 0 | 0 | 0 | 0 | 0 | 0 | 0 | 0 | 0 | 0 | 0 | 0 | 0 |
| 159 | 0 | | 0 | 0 | 0 | 0 | 0 | 0 | 0 | 0 | 0 | 0 | 0 | 0 | 0 | 0 | 0 | 0 | 0 | 0 | 0 | 0 | 0 |
| 160 | 0 | | 0 | 0 | 0 | 0 | 0 | 0 | 0 | 0 | 0 | 0 | 0 | 0 | 0 | 0 | 0 | 0 | 0 | 0 | 0 | 0 | 0 |
| 161 | 0 | | 0 | 0 | 0 | 0 | 0 | 0 | 0 | 0 | 0 | 0 | 0 | 0 | 0 | 0 | 0 | 0 | 0 | 0 | 0 | 0 | 0 |
| 162 | 0 | | 0 | 0 | 0 | 0 | 0 | 0 | 0 | 0 | 0 | 0 | 0 | 0 | 0 | 0 | 0 | 0 | 0 | 0 | 0 | 0 | 0 |
| 163 | 0 | | 0 | 0 | 0 | 0 | 0 | 0 | 0 | 0 | 0 | 0 | 0 | 0 | 0 | 0 | 0 | 0 | 0 | 0 | 0 | 0 | 0 |
| 164 | 0 | | 0 | 0 | 0 | 0 | 0 | 0 | 0 | 0 | 0 | 0 | 0 | 0 | 0 | 0 | 0 | 0 | 0 | 0 | 0 | 0 | 0 |
| 165 | 0 | | 0 | 0 | 0 | 0 | 0 | 0 | 0 | 0 | 0 | 0 | 0 | 0 | 0 | 0 | 0 | 0 | 0 | 0 | 0 | 0 | 0 |
| 166 | 0 | | 0 | 0 | 0 | 0 | 0 | 0 | 0 | 0 | 0 | 0 | 0 | 0 | 0 | 0 | 0 | 0 | 0 | 0 | 0 | 0 | 0 |
| 167 | 0 | | 0 | 0 | 0 | 0 | 0 | 0 | 0 | 0 | 0 | 0 | 0 | 0 | 0 | 0 | 0 | 0 | 0 | 0 | 0 | 0 | 0 |
| 168 | 0 | | 0 | 0 | 0 | 0 | 0 | 0 | 0 | 0 | 0 | 0 | 0 | 0 | 0 | 0 | 0 | 0 | 0 | 0 | 0 | 0 | 0 |
| 169 | 0 | | 0 | 0 | 0 | 0 | 0 | 0 | 0 | 0 | 0 | 0 | 0 | 0 | 0 | 0 | 0 | 0 | 0 | 1 | 0 | 0 | 0 |
| 170 | 0 | | 0 | 0 | 0 | 0 | 0 | 0 | 0 | 0 | 0 | 0 | 0 | 0 | 0 | 0 | 0 | 0 | 0 | 0 | 0 | 0 | 0 |
| 171 | 0 | | 0 | 0 | 0 | 0 | 0 | 0 | 0 | 0 | 0 | 0 | 0 | 0 | 0 | 0 | 0 | 0 | 0 | 0 | 0 | 0 | 0 |
| 172 | 0 | | 0 | 0 | 0 | 0 | 0 | 0 | 0 | 0 | 0 | 0 | 0 | 0 | 0 | 0 | 0 | 0 | 0 | 0 | 0 | 0 | 0 |
| 173 | 0 | | 0 | 0 | 0 | 0 | 0 | 0 | 0 | 0 | 0 | 0 | 0 | 0 | 0 | 0 | 0 | 0 | 0 | 0 | 0 | 0 | 0 |
| 174 | 0 | | 0 | 0 | 0 | 0 | 0 | 0 | 0 | 0 | 0 | 0 | 0 | 0 | 0 | 0 | 0 | 0 | 0 | 0 | 0 | 0 | 0 |
| 175 | 0 | | 0 | 0 | 0 | 0 | 0 | 0 | 0 | 0 | 0 | 0 | 0 | 0 | 0 | 0 | 0 | 0 | 0 | 0 | 0 | 0 | 0 |
| 176 | 0 | | 0 | 0 | 0 | 0 | 0 | 0 | 0 | 0 | 0 | 1 | 0 | 0 | 0 | 0 | 0 | 0 | 0 | 0 | 0 | 0 | 0 |
| 177 | 0 | | 0 | 0 | 0 | 0 | 0 | 0 | 0 | 0 | 0 | 0 | 0 | 0 | 0 | 0 | 0 | 0 | 0 | 0 | 0 | 0 | 0 |
| 178 | 0 | | 0 | 0 | 0 | 0 | 0 | 0 | 0 | 0 | 0 | 0 | 0 | 0 | 0 | 0 | 0 | 0 | 0 | 0 | 0 | 0 | 0 |
| 179 | 0 | | 0 | 0 | 0 | 0 | 0 | 0 | 0 | 0 | 0 | 0 | 0 | 0 | 0 | 0 | 0 | 0 | 0 | 0 | 0 | 0 | 0 |
| 180 | 0 | | 0 | 0 | 0 | 0 | 0 | 0 | 0 | 0 | 0 | 0 | 0 | 0 | 0 | 0 | 0 | 0 | 0 | 0 | 0 | 0 | 0 |
| 181 | 0 | | 0 | 0 | 0 | 0 | 0 | 0 | 0 | 0 | 0 | 0 | 0 | 0 | 0 | 0 | 0 | 0 | 0 | 0 | 0 | 0 | 0 |
| 182 | 0 | | 0 | 0 | 0 | 0 | 0 | 0 | 0 | 0 | 0 | 0 | 0 | 0 | 0 | 0 | 0 | 0 | 0 | 0 | 0 | 0 | 0 |
| 183 | 0 | | 0 | 0 | 0 | 0 | 0 | 0 | 0 | 0 | 0 | 0 | 0 | 0 | 0 | 0 | 0 | 0 | 0 | 0 | 0 | 0 | 0 |
| 184 | 0 | | 0 | 0 | 0 | 0 | 0 | 0 | 0 | 0 | 0 | 0 | 0 | 0 | 0 | 0 | 0 | 0 | 0 | 0 | 0 | 0 | 0 |
| 185 | 0 | | 0 | 0 | 0 | 0 | 0 | 0 | 0 | 0 | 0 | 0 | 0 | 0 | 0 | 0 | 0 | 0 | 0 | 0 | 0 | 0 | 0 |
| 186 | 0 | | 0 | 0 | 0 | 0 | 0 | 0 | 0 | 0 | 0 | 0 | 0 | 0 | 0 | 0 | 0 | 0 | 0 | 0 | 0 | 0 | 0 |
| 187 | 0 | | 0 | 0 | 0 | 0 | 0 | 0 | 0 | 0 | 0 | 0 | 0 | 0 | 0 | 0 | 0 | 0 | 0 | 0 | 0 | 0 | 0 |
| 188 | 0 | | 0 | 0 | 0 | 0 | 0 | 0 | 0 | 0 | 0 | 0 | 0 | 0 | 0 | 0 | 0 | 0 | 0 | 0 | 0 | 0 | 0 |
| 189 | 0 | | 0 | 0 | 0 | 0 | 0 | 0 | 0 | 0 | 0 | 0 | 0 | 0 | 0 | 0 | 0 | 0 | 0 | 0 | 0 | 0 | 0 |
| 190 | 0 | | 0 | 0 | 0 | 0 | 0 | 0 | 0 | 0 | 0 | 0 | 0 | 0 | 0 | 0 | 0 | 0 | 0 | 0 | 0 | 0 | 0 |
| 191 | 0 | | 0 | 0 | 0 | 0 | 0 | 0 | 0 | 0 | 0 | 2 | 0 | 0 | 0 | 0 | 0 | 0 | 0 | 0 | 0 | 0 | 0 |
| 192 | 0 | | 0 | 0 | 0 | 0 | 0 | 0 | 0 | 0 | 0 | 1 | 0 | 0 | 0 | 0 | 0 | 0 | 0 | 1 | 0 | 0 | 0 |
| 193 | 0 | | 0 | 0 | 0 | 0 | 0 | 0 | 0 | 0 | 0 | 0 | 0 | 0 | 0 | 0 | 0 | 0 | 0 | 0 | 0 | 0 | 0 |
| 194 | 0 | | 0 | 0 | 0 | 0 | 0 | 0 | 0 | 0 | 0 | 0 | 0 | 0 | 0 | 0 | 0 | 0 | 0 | 0 | 0 | 0 | 0 |
| 195 | 0 | | 0 | 0 | 0 | 0 | 0 | 0 | 0 | 0 | 0 | 0 | 0 | 0 | 0 | 0 | 0 | 0 | 0 | 0 | 0 | 0 | 0 |
| 196 | 0 | | 0 | 0 | 0 | 0 | 0 | 0 | 0 | 0 | 0 | 0 | 0 | 0 | 0 | 0 | 0 | 0 | 0 | 0 | 0 | 0 | 0 |
| 197 | 0 | | 0 | 0 | 0 | 0 | 0 | 0 | 0 | 0 | 0 | 0 | 0 | 0 | 0 | 0 | 0 | 0 | 0 | 0 | 0 | 0 | 0 |
| 198 | 0 | | 0 | 0 | 0 | 0 | 0 | 0 | 0 | 0 | 0 | 0 | 0 | 0 | 0 | 0 | 0 | 0 | 0 | 0 | 0 | 0 | 0 |
| 199 | 0 | | 0 | 0 | 0 | 0 | 0 | 0 | 0 | 0 | 0 | 0 | 0 | 0 | 0 | 0 | 0 | 0 | 0 | 0 | 0 | 0 | 0 |
| 200 | 0 | | 0 | 0 | 0 | 0 | 0 | 0 | 0 | 0 | 0 | 0 | 0 | 0 | 0 | 0 | 0 | 0 | 0 | 0 | 0 | 0 | 0 |
| 201 | 0 | | 0 | 0 | 0 | 0 | 0 | 0 | 0 | 0 | 0 | 0 | 0 | 0 | 0 | 0 | 0 | 0 | 0 | 0 | 0 | 0 | 0 |
| 202 | 0 | | 0 | 0 | 0 | 0 | 0 | 0 | 0 | 0 | 0 | 0 | 0 | 0 | 0 | 0 | 0 | 0 | 0 | 0 | 0 | 0 | 0 |
| 203 | 0 | | 0 | 0 | 0 | 0 | 0 | 0 | 0 | 0 | 0 | 0 | 0 | 0 | 0 | 0 | 0 | 0 | 0 | 0 | 0 | 0 | 0 |
| 204 | 0 | | 0 | 0 | 0 | 0 | 0 | 0 | 0 | 0 | 0 | 0 | 0 | 0 | 0 | 0 | 0 | 0 | 0 | 0 | 0 | 0 | 0 |
| 205 | 0 | | 0 | 0 | 0 | 0 | 0 | 0 | 0 | 0 | 0 | 0 | 0 | 0 | 0 | 0 | 0 | 0 | 0 | 0 | 0 | 0 | 0 |
| 206 | 0 | | 0 | 0 | 0 | 0 | 0 | 0 | 0 | 0 | 0 | 0 | 0 | 0 | 0 | 0 | 0 | 0 | 0 | 0 | 0 | 0 | 0 |
| 207 | 0 | | 0 | 0 | 0 | 0 | 0 | 0 | 0 | 0 | 0 | 0 | 0 | 0 | 0 | 0 | 0 | 0 | 0 | 0 | 0 | 0 | 0 |
| 208 | 0 | | 0 | 0 | 0 | 0 | 0 | 0 | 0 | 0 | 0 | 0 | 0 | 0 | 0 | 0 | 0 | 0 | 0 | 0 | 0 | 0 | 0 |
| 209 | 0 | | 0 | 0 | 0 | 0 | 0 | 0 | 0 | 0 | 0 | 0 | 0 | 0 | 0 | 0 | 0 | 0 | 0 | 0 | 0 | 0 | 0 |
| 210 | 0 | | 0 | 0 | 0 | 0 | 0 | 0 | 0 | 0 | 0 | 0 | 0 | 0 | 0 | 0 | 0 | 0 | 0 | 0 | 0 | 0 | 0 |
| 211 | 0 | | 0 | 0 | 0 | 0 | 0 | 0 | 0 | 0 | 0 | 0 | 0 | 0 | 0 | 0 | 0 | 0 | 0 | 0 | 0 | 0 | 0 |
| 212 | 0 | | 0 | 0 | 0 | 0 | 0 | 0 | 0 | 0 | 0 | 0 | 0 | 0 | 0 | 0 | 0 | 0 | 0 | 0 | 0 | 0 | 0 |
| 213 | 0 | | 0 | 0 | 0 | 0 | 0 | 0 | 0 | 0 | 0 | 0 | 0 | 0 | 0 | 0 | 0 | 0 | 0 | 0 | 0 | 0 | 0 |
| 214 | 0 | | 0 | 0 | 0 | 0 | 0 | 0 | 0 | 0 | 0 | 0 | 0 | 0 | 0 | 0 | 0 | 0 | 0 | 0 | 0 | 0 | 0 |
| 215 | 0 | | 0 | 0 | 0 | 0 | 0 | 0 | 0 | 0 | 0 | 0 | 0 | 0 | 0 | 0 | 0 | 0 | 0 | 0 | 0 | 0 | 0 |
| 216 | 0 | | 0 | 0 | 0 | 0 | 0 | 0 | 0 | 0 | 0 | 0 | 0 | 0 | 0 | 0 | 0 | 0 | 0 | 0 | 0 | 0 | 0 |
| 217 | 0 | | 0 | 0 | 0 | 0 | 0 | 0 | 0 | 0 | 0 | 0 | 0 | 0 | 0 | 0 | 0 | 0 | 0 | 0 | 0 | 0 | 0 |
| 218 | 0 | | 0 | 0 | 0 | 0 | 0 | 0 | 0 | 0 | 0 | 0 | 0 | 0 | 0 | 0 | 0 | 0 | 0 | 0 | 0 | 0 | 0 |
| 219 | 0 | | 0 | 0 | 0 | 0 | 0 | 0 | 0 | 0 | 0 | 0 | 0 | 0 | 0 | 0 | 0 | 0 | 0 | 0 | 0 | 0 | 0 |
| 220 | 0 | | 0 | 0 | 0 | 0 | 0 | 0 | 0 | 0 | 0 | 0 | 0 | 0 | 0 | 0 | 0 | 0 | 0 | 0 | 0 | 0 | 0 |
| 221 | 0 | | 0 | 0 | 0 | 0 | 0 | 0 | 0 | 0 | 0 | 0 | 0 | 0 | 0 | 0 | 0 | 0 | 0 | 0 | 0 | 0 | 0 |
| 222 | 0 | | 0 | 0 | 0 | 0 | 0 | 0 | 0 | 0 | 0 | 0 | 0 | 0 | 0 | 0 | 0 | 0 | 0 | 0 | 0 | 0 | 0 |
| 223 | 0 | | 0 | 0 | 0 | 0 | 0 | 0 | 0 | 0 | 0 | 0 | 0 | 0 | 0 | 0 | 0 | 0 | 0 | 0 | 0 | 0 | 0 |
| 224 | 0 | | 0 | 0 | 0 | 0 | 0 | 0 | 0 | 0 | 0 | 0 | 0 | 0 | 0 | 0 | 0 | 0 | 0 | 0 | 0 | 0 | 0 |
| 225 | 0 | | 0 | 0 | 0 | 0 | 0 | 0 | 0 | 0 | 0 | 0 | 0 | 0 | 0 | 0 | 0 | 0 | 0 | 0 | 0 | 0 | 0 |
| 226 | 0 | | 0 | 0 | 0 | 0 | 0 | 0 | 0 | 0 | 0 | 0 | 0 | 0 | 0 | 0 | 0 | 0 | 0 | 0 | 0 | 0 | 0 |
| 227 | 0 | | 0 | 0 | 0 | 0 | 0 | 0 | 0 | 0 | 0 | 0 | 0 | 0 | 0 | 0 | 0 | 0 | 0 | 0 | 0 | 0 | 0 |
| 228 | 0 | | 0 | 0 | 0 | 0 | 0 | 0 | 0 | 0 | 0 | 0 | 0 | 0 | 0 | 0 | 0 | 0 | 0 | 0 | 0 | 0 | 0 |
| 229 | 0 | | 0 | 0 | 0 | 0 | 0 | 0 | 0 | 0 | 0 | 0 | 0 | 0 | 0 | 0 | 0 | 0 | 0 | 0 | 0 | 0 | 0 |
| 230 | 0 | | 0 | 0 | 0 | 0 | 0 | 0 | 0 | 0 | 0 | 0 | 0 | 0 | 0 | 0 | 0 | 0 | 0 | 0 | 0 | 0 | 0 |
| 231 | 0 | | 0 | 0 | 0 | 0 | 0 | 0 | 0 | 0 | 0 | 0 | 0 | 0 | 0 | 0 | 0 | 0 | 0 | 0 | 0 | 0 | 0 |
| 232 | 0 | | 0 | 0 | 0 | 0 | 0 | 0 | 0 | 0 | 0 | 0 | 0 | 0 | 0 | 0 | 0 | 0 | 0 | 0 | 0 | 0 | 0 |
| 233 | 0 | | 0 | 0 | 0 | 0 | 0 | 0 | 0 | 0 | 0 | 0 | 0 | 0 | 0 | 0 | 0 | 0 | 0 | 0 | 0 | 0 | 0 |
| 234 | 0 | | 0 | 0 | 0 | 0 | 0 | 0 | 0 | 0 | 0 | 0 | 0 | 0 | 0 | 0 | 0 | 0 | 0 | 0 | 0 | 0 | 0 |
| 235 | 0 | | 0 | 0 | 0 | 0 | 0 | 0 | 0 | 0 | 0 | 0 | 0 | 0 | 0 | 0 | 0 | 0 | 0 | 0 | 0 | 0 | 0 |
| 236 | 0 | | 0 | 0 | 0 | 0 | 0 | 0 | 0 | 0 | 0 | 0 | 0 | 0 | 0 | 0 | 0 | 0 | 0 | 0 | 0 | 0 | 0 |
| 237 | 0 | | 0 | 0 | 0 | 0 | 0 | 0 | 0 | 0 | 0 | 1 | 0 | 0 | 0 | 0 | 0 | 0 | 0 | 0 | 0 | 0 | 0 |
| 238 | 0 | | 0 | 0 | 0 | 0 | 0 | 0 | 0 | 0 | 0 | 0 | 0 | 0 | 0 | 0 | 0 | 0 | 0 | 0 | 0 | 0 | 0 |
| 239 | 0 | | 0 | 0 | 0 | 0 | 0 | 0 | 0 | 0 | 0 | 0 | 0 | 0 | 0 | 0 | 0 | 0 | 0 | 0 | 0 | 0 | 0 |
| 240 | 1 | | 2 | 0 | 0 | 0 | 0 | 0 | 0 | 0 | 0 | 0 | 0 | 0 | 0 | 0 | 0 | 1 | 1 | 3 | 1 | 0 | 1 |
| 241 | 0 | | 0 | 0 | 0 | 0 | 0 | 0 | 0 | 0 | 0 | 0 | 0 | 0 | 0 | 0 | 0 | 0 | 0 | 0 | 0 | 0 | 0 |
| 242 | 0 | | 0 | 0 | 0 | 0 | 0 | 0 | 0 | 0 | 0 | 0 | 0 | 0 | 0 | 0 | 0 | 0 | 0 | 0 | 0 | 0 | 0 |
| 243 | 0 | | 0 | 0 | 0 | 0 | 0 | 0 | 0 | 0 | 0 | 0 | 0 | 0 | 0 | 0 | 0 | 0 | 0 | 0 | 0 | 0 | 0 |
| 244 | 0 | | 0 | 0 | 0 | 0 | 0 | 0 | 0 | 0 | 0 | 0 | 0 | 0 | 0 | 0 | 0 | 0 | 0 | 0 | 0 | 0 | 0 |
| 245 | 0 | | 0 | 0 | 0 | 0 | 0 | 0 | 0 | 0 | 0 | 0 | 0 | 0 | 0 | 0 | 0 | 0 | 0 | 0 | 0 | 0 | 0 |
| 246 | 0 | | 0 | 0 | 0 | 0 | 0 | 0 | 0 | 0 | 0 | 0 | 0 | 0 | 0 | 0 | 0 | 0 | 0 | 0 | 0 | 0 | 0 |
| 247 | 0 | | 0 | 0 | 0 | 0 | 0 | 0 | 0 | 0 | 0 | 0 | 0 | 0 | 0 | 0 | 0 | 0 | 0 | 0 | 0 | 0 | 0 |
| 248 | 0 | | 0 | 0 | 0 | 0 | 0 | 0 | 0 | 0 | 0 | 0 | 0 | 0 | 0 | 0 | 0 | 0 | 0 | 0 | 0 | 0 | 0 |
| 249 | 0 | | 0 | 0 | 0 | 0 | 0 | 0 | 0 | 0 | 0 | 0 | 0 | 0 | 0 | 0 | 0 | 0 | 0 | 0 | 0 | 0 | 0 |
| 250 | 0 | | 0 | 0 | 0 | 0 | 0 | 0 | 0 | 0 | 0 | 0 | 0 | 0 | 0 | 0 | 0 | 0 | 0 | 0 | 0 | 0 | 0 |
| 251 | 0 | | 0 | 0 | 0 | 0 | 0 | 0 | 0 | 0 | 0 | 0 | 0 | 0 | 0 | 0 | 0 | 0 | 0 | 0 | 0 | 0 | 0 |
| 252 | 0 | | 0 | 0 | 0 | 0 | 0 | 0 | 0 | 0 | 0 | 0 | 0 | 0 | 0 | 0 | 0 | 0 | 0 | 0 | 0 | 0 | 0 |
| 253 | 0 | | 0 | 0 | 0 | 0 | 0 | 0 | 0 | 0 | 0 | 0 | 0 | 0 | 0 | 0 | 0 | 0 | 0 | 0 | 0 | 0 | 1 |
| 254 | 0 | | 0 | 0 | 0 | 0 | 0 | 0 | 0 | 0 | 0 | 0 | 0 | 0 | 0 | 0 | 0 | 0 | 0 | 2 | 0 | 0 | 0 |
| 255 | 0 | | 0 | 0 | 0 | 0 | 0 | 0 | 0 | 0 | 0 | 0 | 0 | 0 | 0 | 0 | 0 | 0 | 0 | 0 | 0 | 0 | 0 |
| 256 | 1 | | 2 | 0 | 0 | 0 | 1 | 4 | 0 | 0 | 0 | 2 | 0 | 0 | 0 | 0 | 0 | 3 | 0 | 0 | 1 | 0 | 0 |

**Supplementary Figure 1:** Injection sites for skin test using five antigens. (A) Left side has injection sites for three antigens. (B) The right side of the neck has two injection sites. (C) Each of the five injections (antigens) was administered in rotation through all five injection sites on both sides of the neck, following a Latin square design (5x5 Latin square design, the five antigens rotated through all the five injection sites).


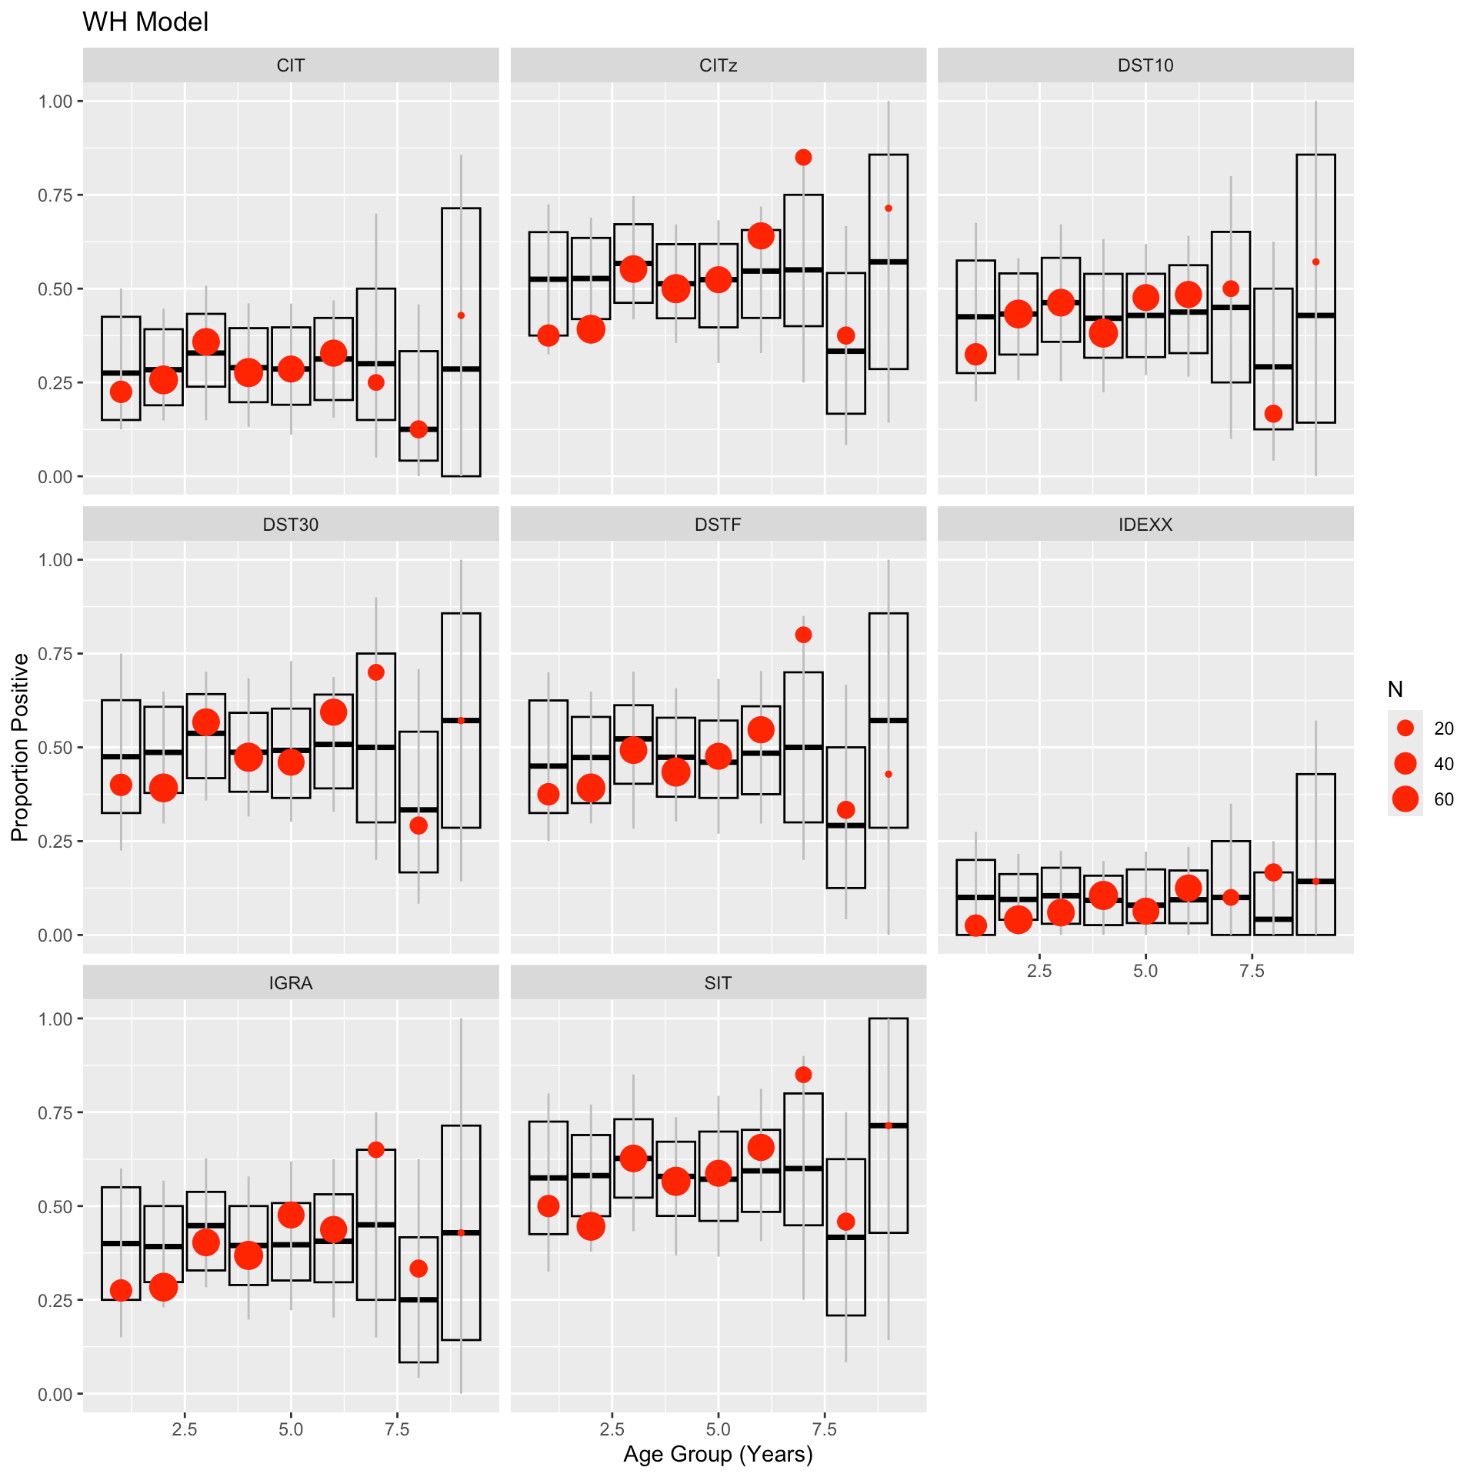


**Supplementary Figure 2:** Posterior predictive distributions for apparent prevalence of bTB stratified by age and the eight diagnostic tests for the WH latent class model stratified by age (9 annual age cohorts). Predictive distributions are presented as boxplots (crossbars) indicating median and 95% intervals and line intervals indicated posterior range. Observed values are plotted as points with size proportional to the number of observations within each age-group. The WH model (with no age-dependent effects) systematically underestimates prevalence in the 1-2 year age groups for the CITz, IGRA and SIT tests and overestimates prevalence for the 7 year age group.

**
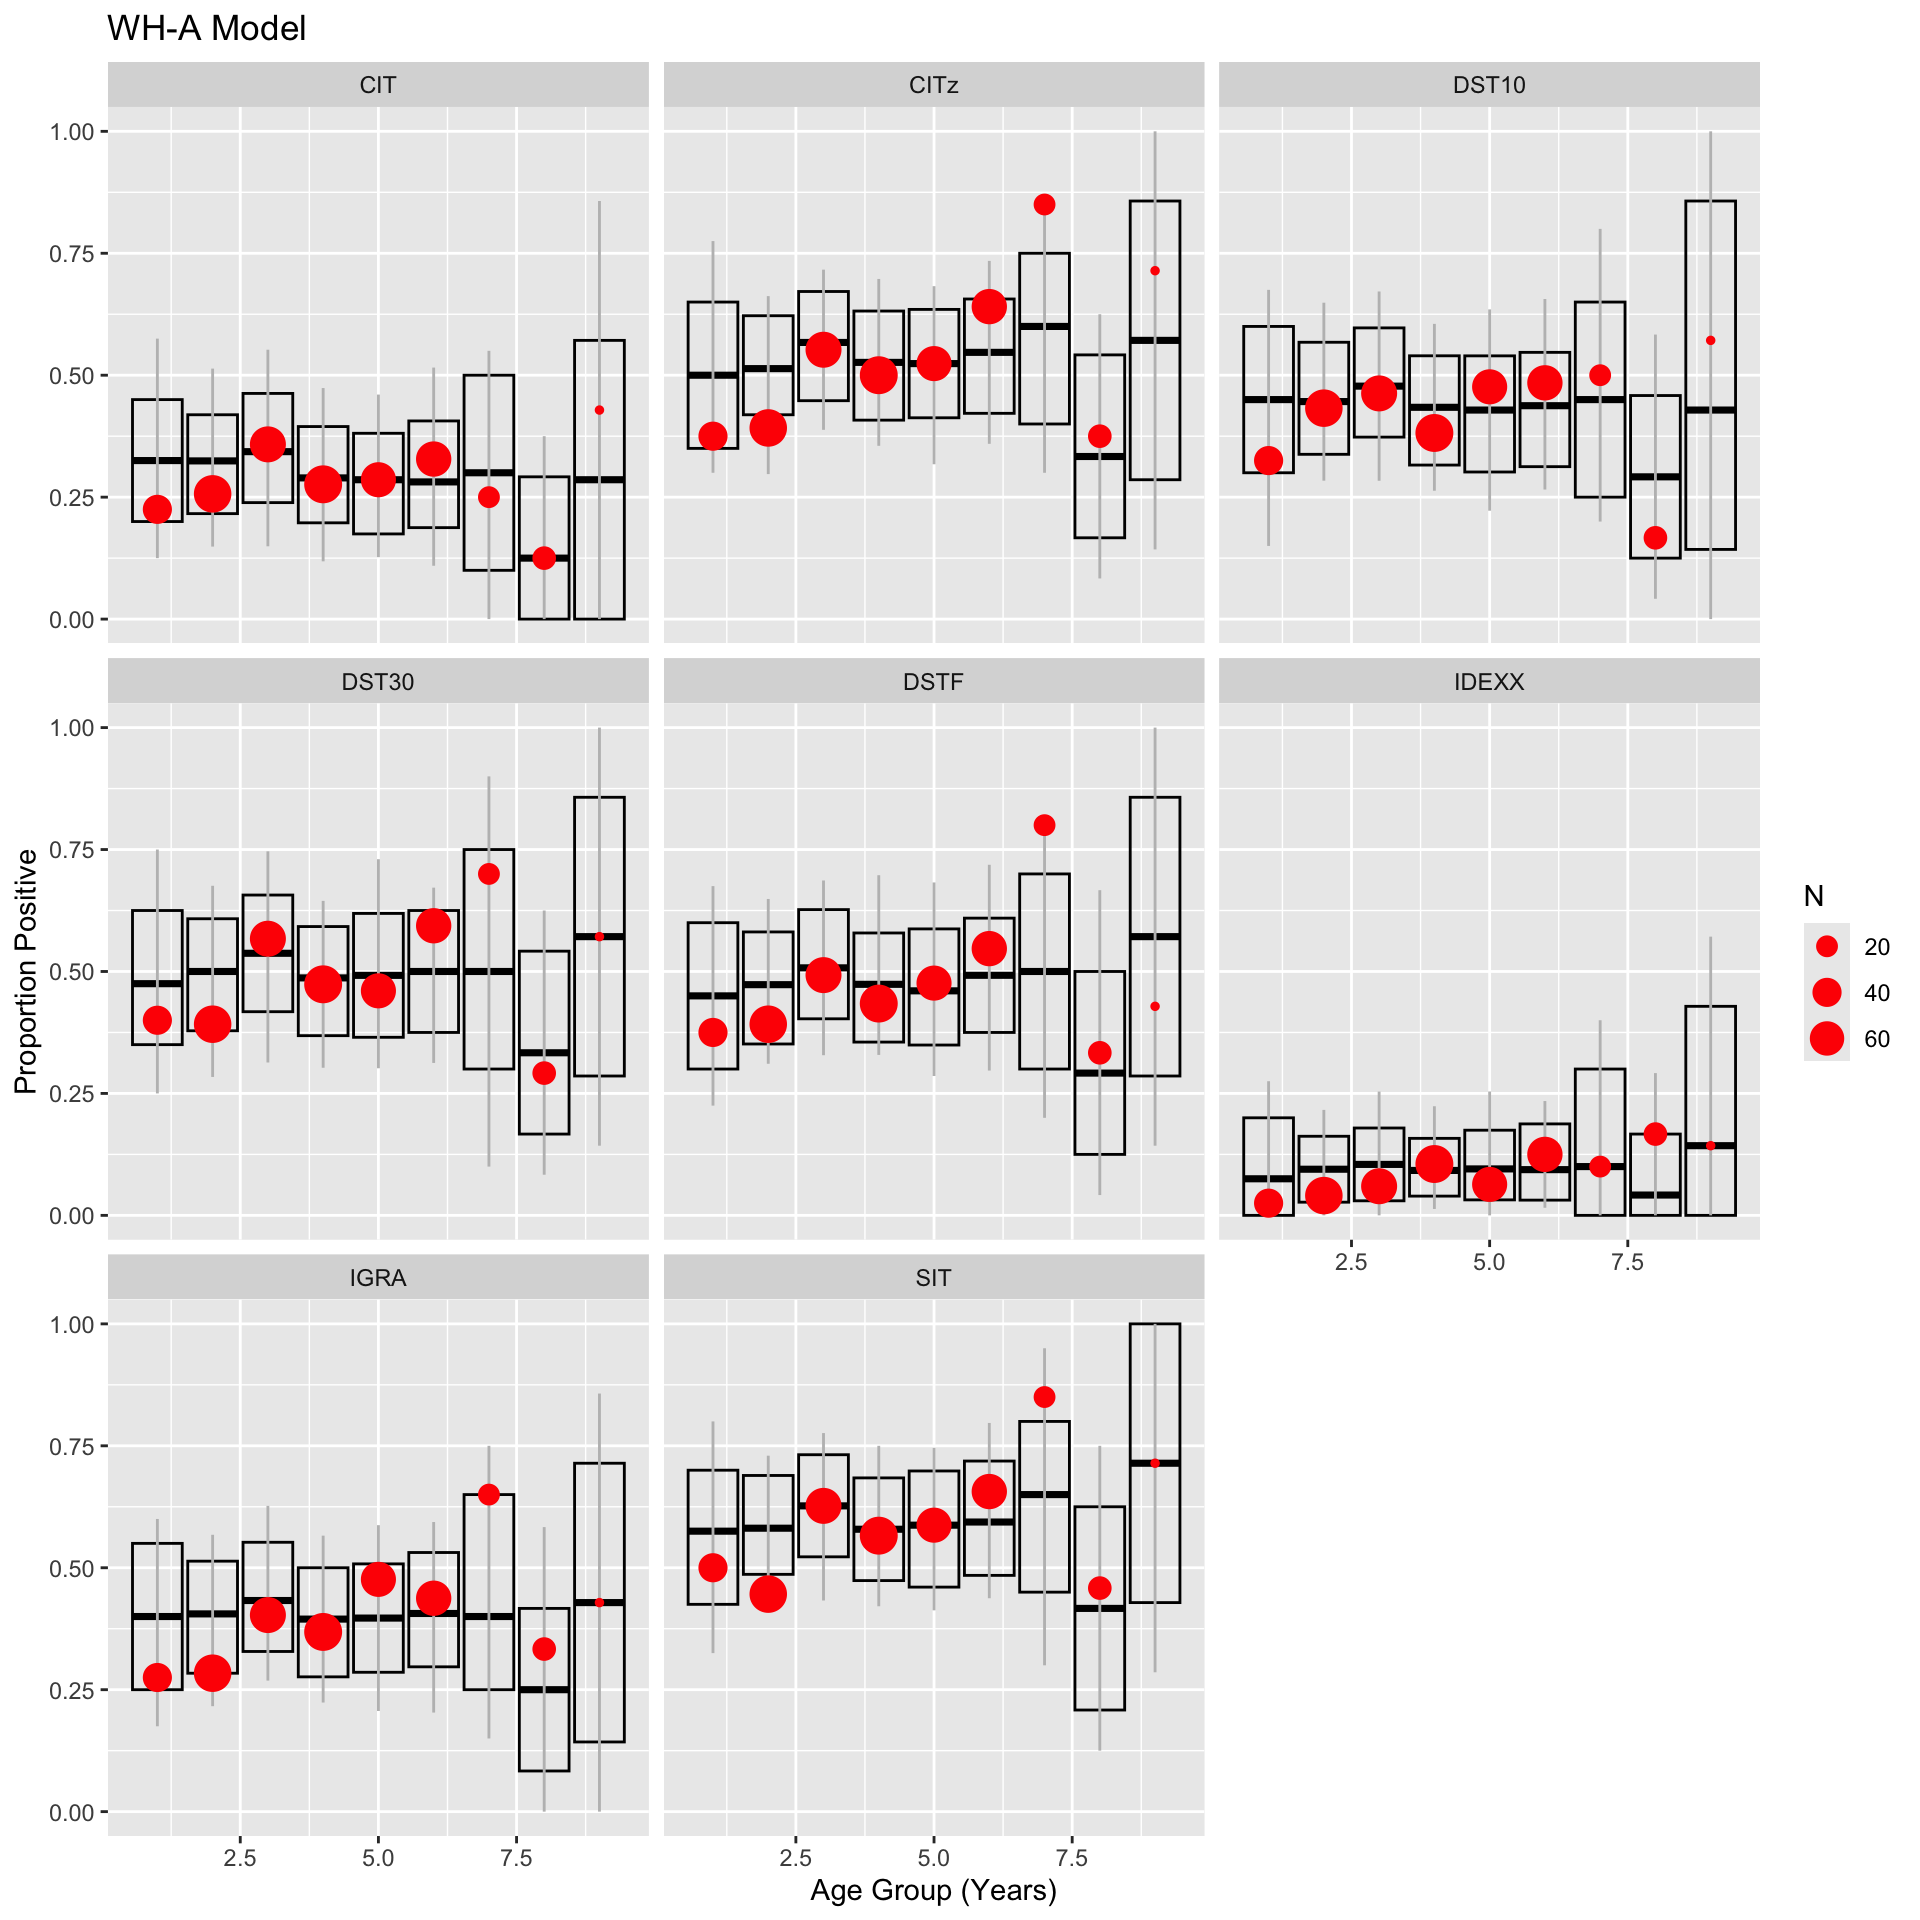
Supplementary Figure 3:** Posterior predictive distributions for apparent prevalence of bTB stratified by age and the eight diagnostic tests for the WH-A latent class model stratified by age (9 annual age cohorts). Predictive distributions are presented as boxplots (crossbars) indicating median and 95% intervals and line intervals indicated posterior range. Observed values are plotted as points with size proportional to the number of observations within each age-group. The WH-A model (with age-dependent test sensitivity) systematically underestimates prevalence in the 1-2 year age groups for the CITz, IGRA and SIT tests and overestimates prevalence for the 7 year age group.

**
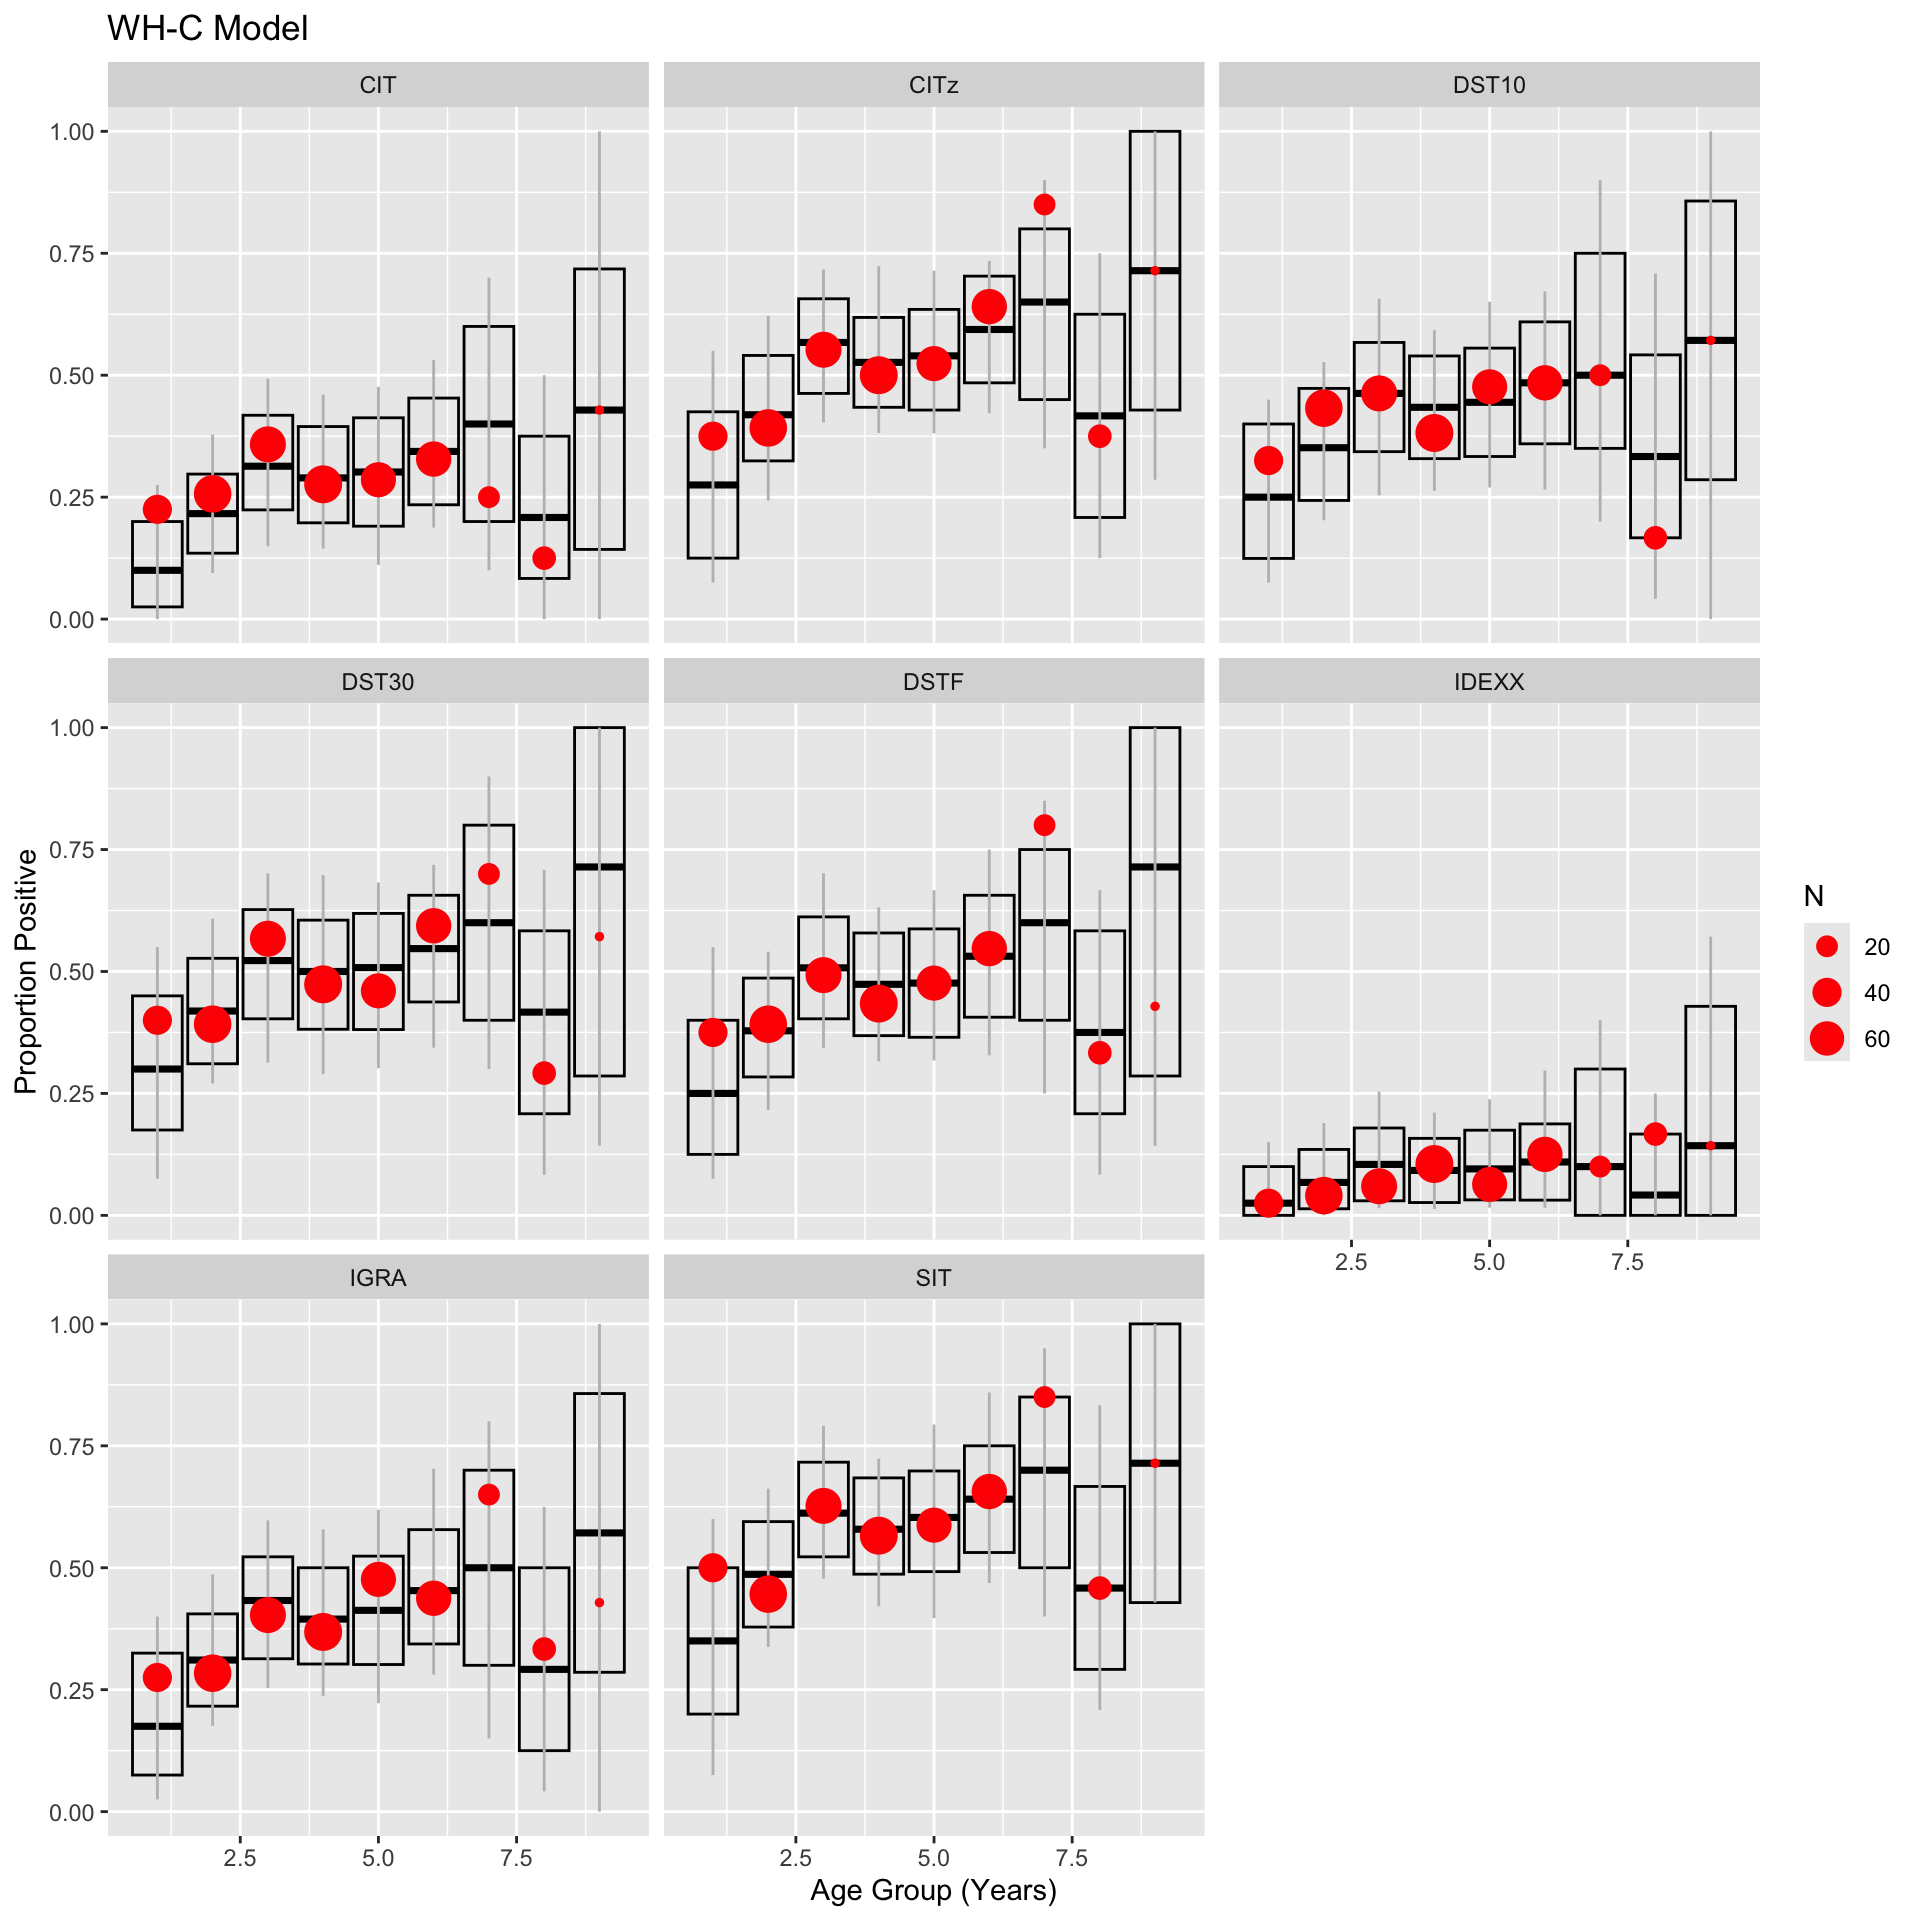
Supplementary Figure 4**: Posterior predictive distributions for apparent prevalence of bTB stratified by age and the eight diagnostic tests for the WH-C latent class model stratified by age (9 annual age cohorts). Predictive distributions are presented as boxplots (crossbars) indicating median and 95% intervals and line intervals indicated posterior range. Observed values are plotted as points with size proportional to the number of observations within each age-group. In contrast to the models which assume prevalence is age independent the WH-C model observed prevalence within each group lies within or on the 95% intervals.


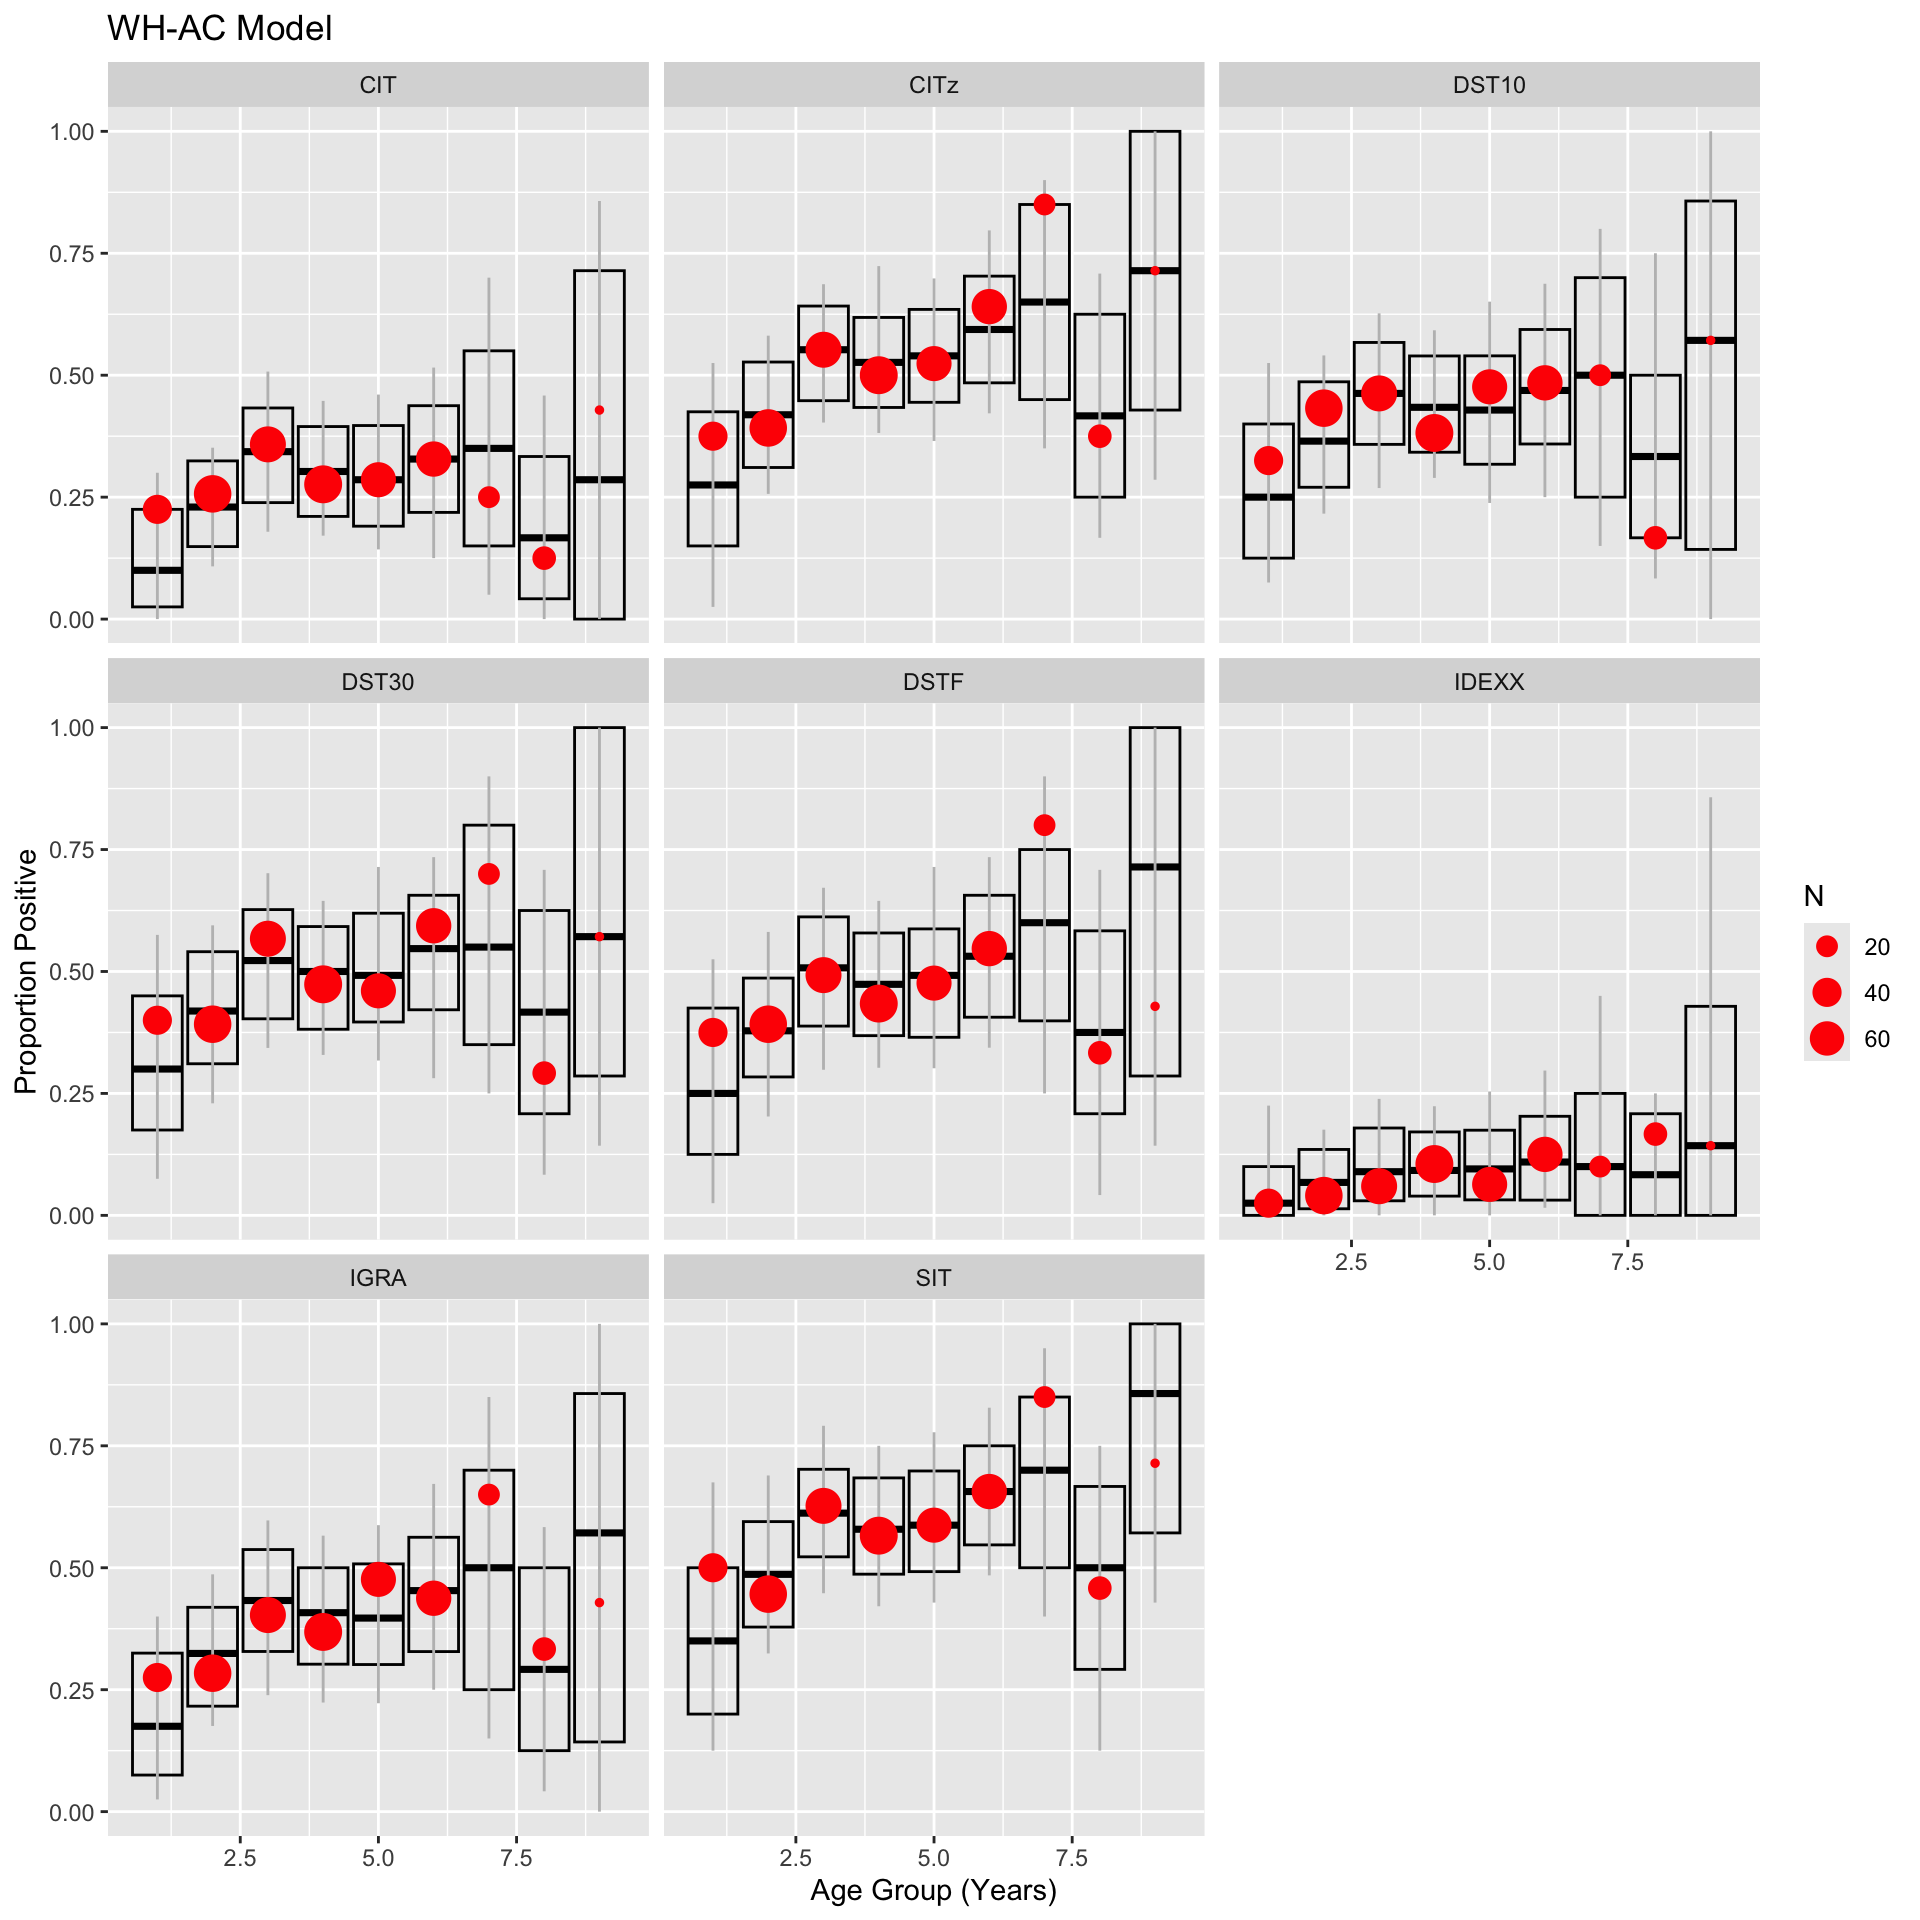


**Supplementary Figure 5**: Posterior predictive distributions for apparent prevalence of bTB stratified by age and the eight diagnostic tests for the WH-AC latent class model stratified by age (9 annual age cohorts). Predictive distributions are presented as boxplots (crossbars) indicating median and 95% intervals and line intervals indicated posterior range. Observed values are plotted as points with size proportional to the number of observations within each age-group. In contrast to the models which assume prevalence is age independent the WH-AC model observed prevalence within each group lies within or on the 95% intervals.


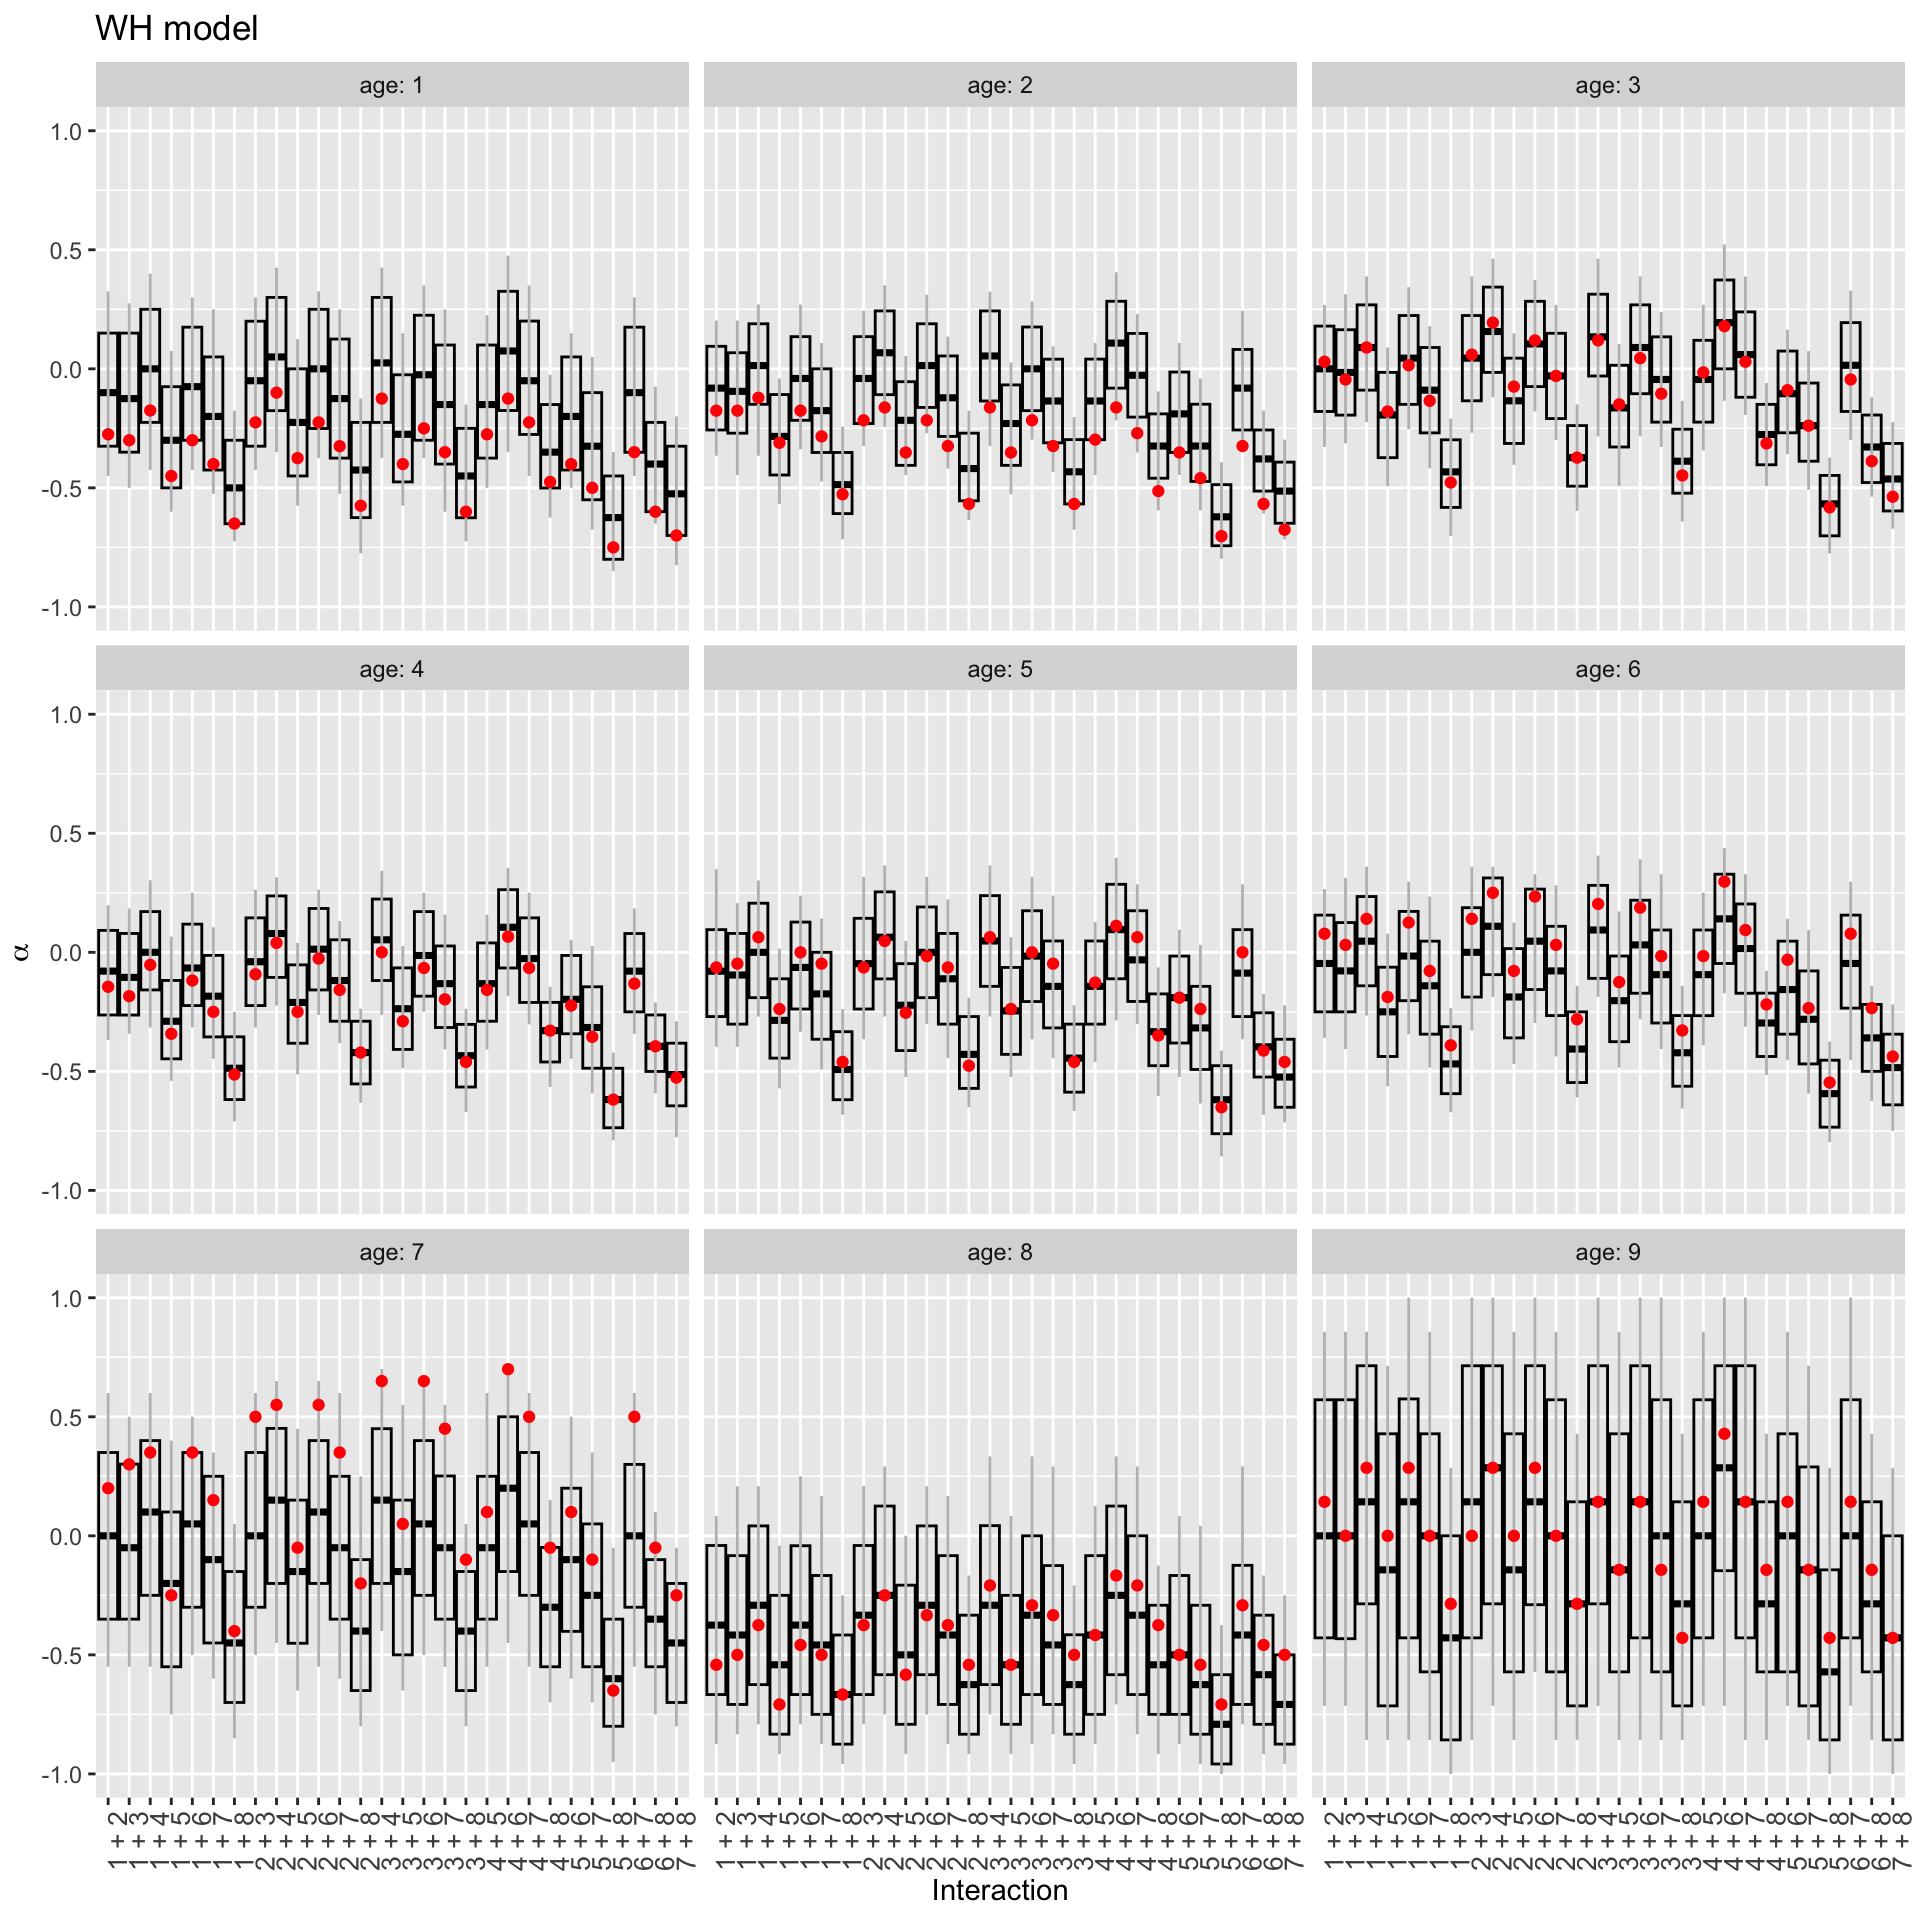


**Supplementary Figure 6:** Posterior predictive distributions for the pairwise probability of agreement between tests ( stratified by age and interaction ( where k numbers the diagnostic tests in order (1=DST10, 2=DST30, 3=DSTF, 4=SIT, 5=CIT, 6=CITz, 7=IGRA, 8=IDEXX). Predictive distributions are plotted as boxplots with central estimate indicated by median, hinges by the 95% interval and full distribution by (thinner) vertical grey lines. is a test statistic for conditional dependence between tests. Observed values of (red points) that lie outside of the posterior predictive distribution from the model are evidence of a lack of model fit which may be due to the presence of conditional dependence between tests or the impact of other confounding factors. For the WH model the lack of fit with respect to the prevalence of infection (Supplementary Figure 2) leads to systematic lack of fit with respect to for the 1-2 and 6-7 age groups


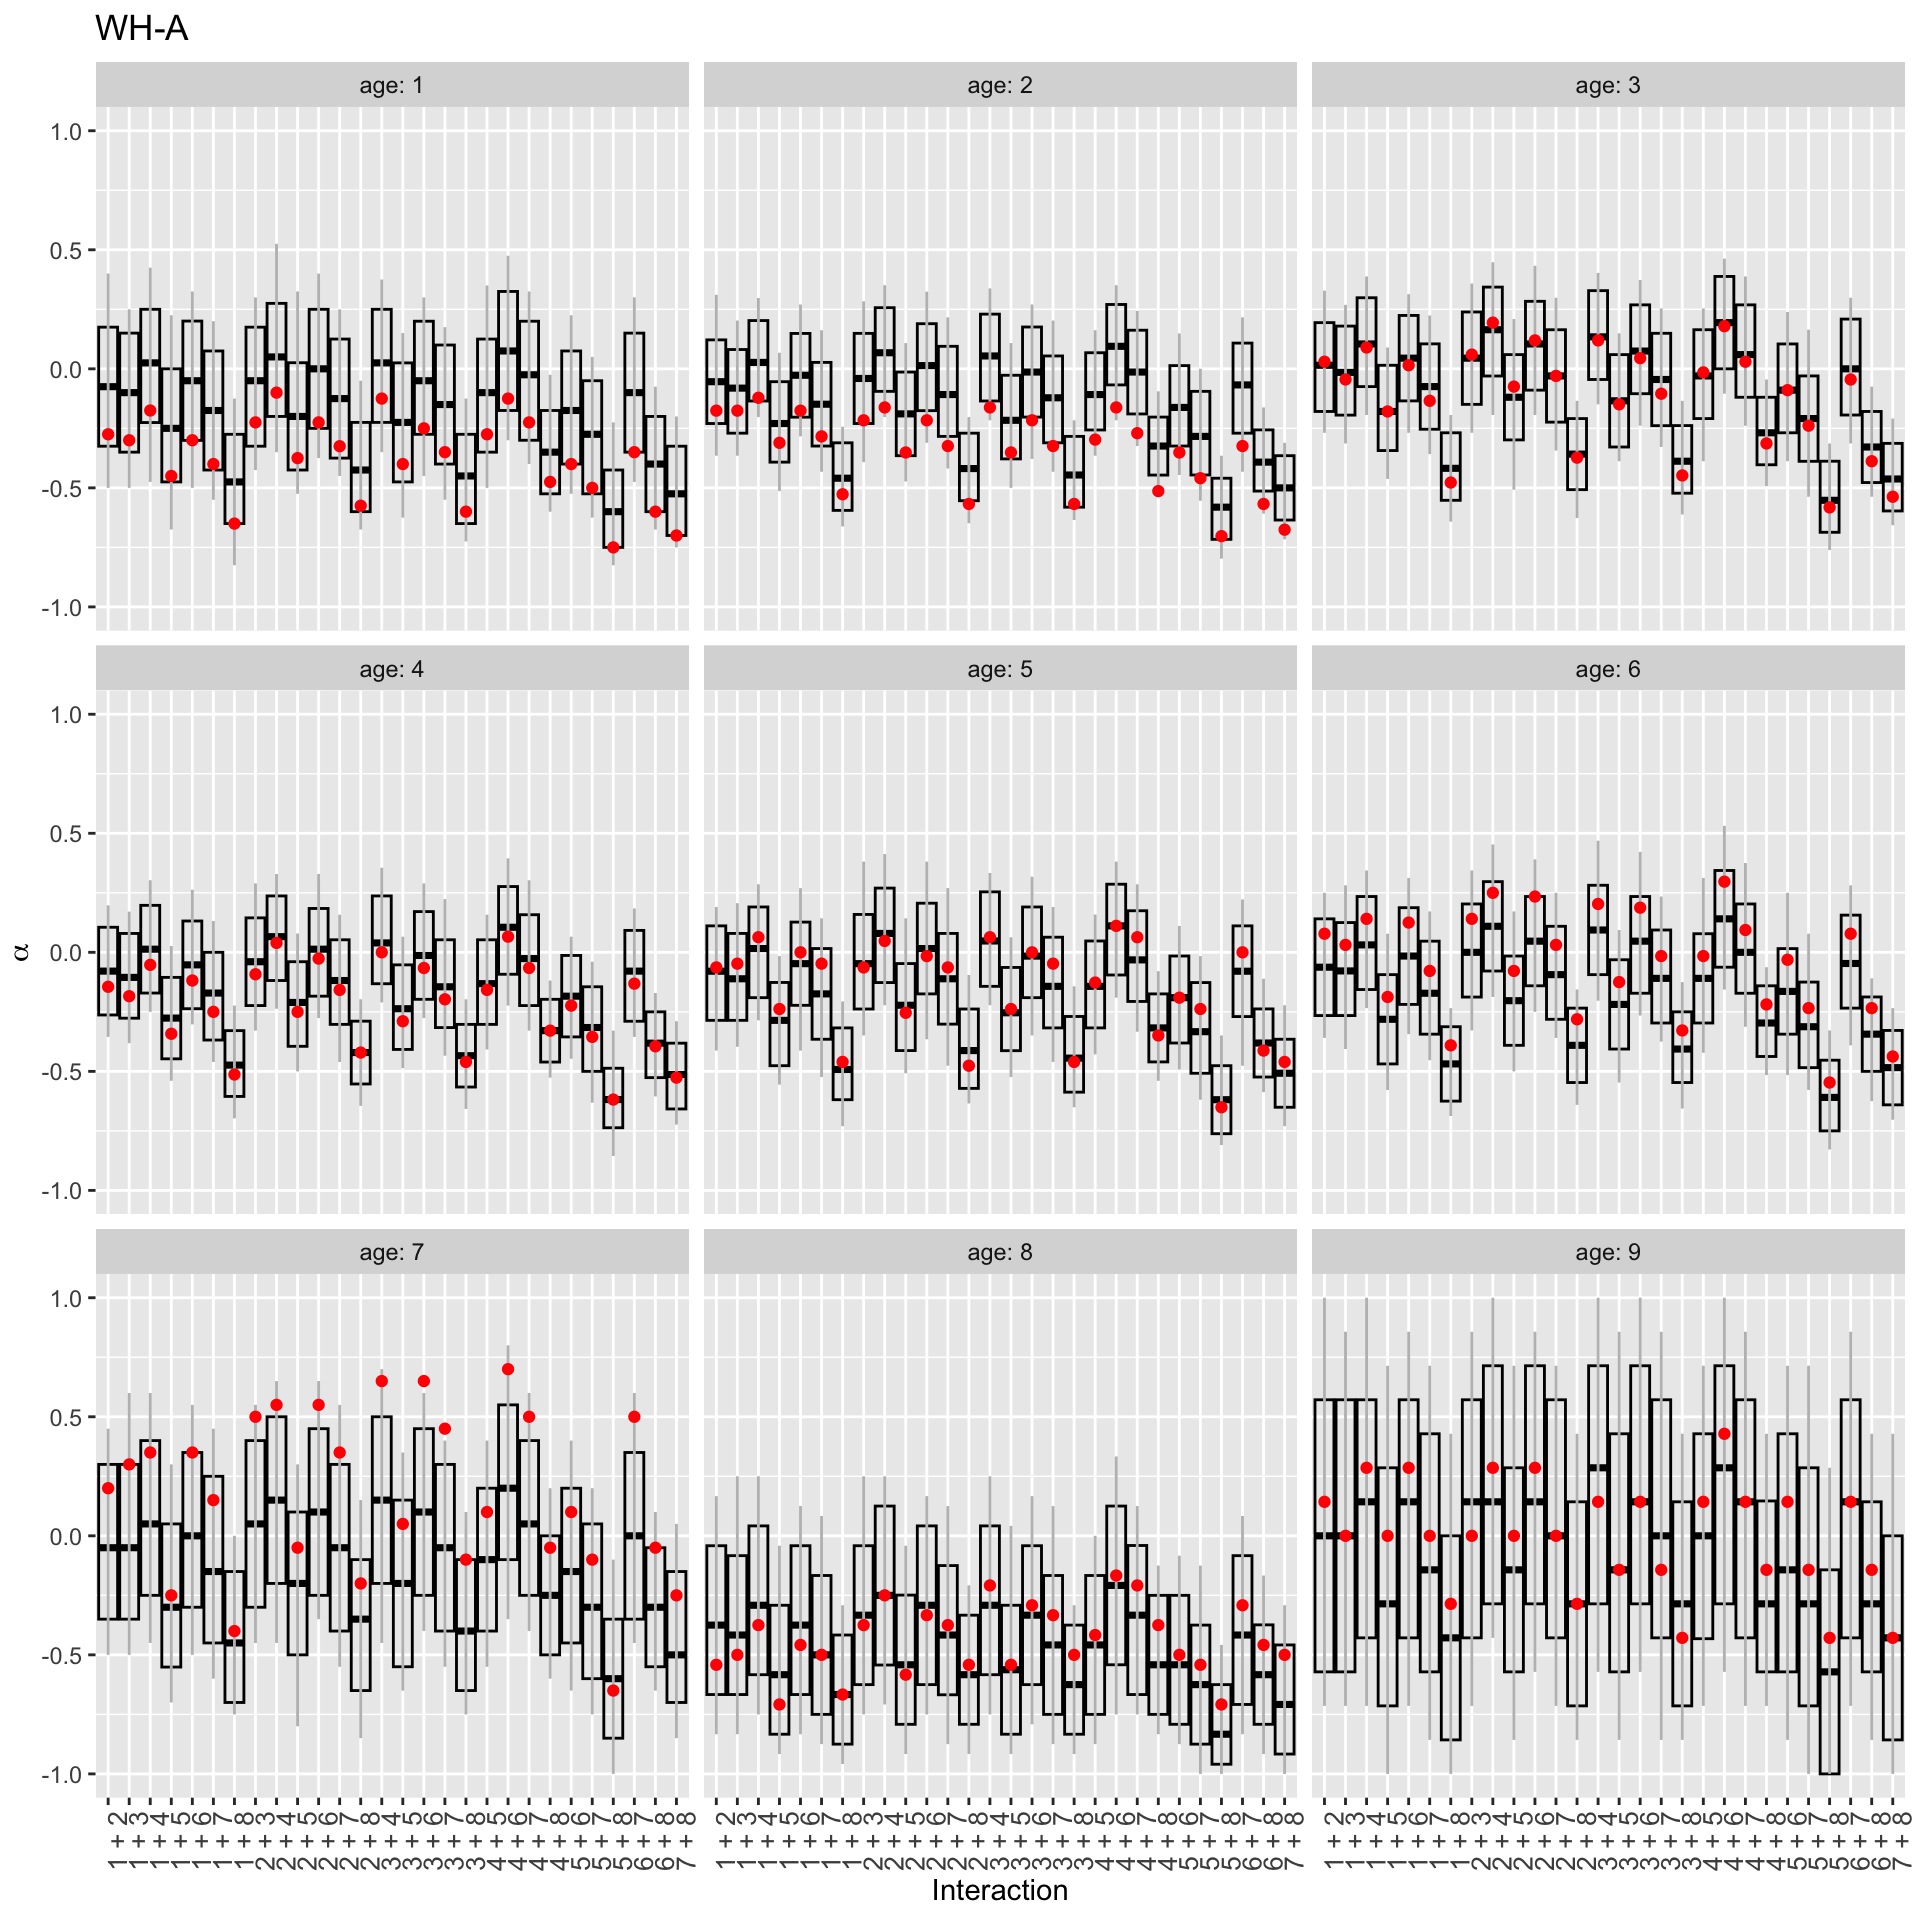


**Supplementary Figure 7:** Posterior predictive distributions for the pairwise probability of agreement between tests ( stratified by age and interaction ( where k numbers the diagnostic tests in order (1=DST10, 2=DST30, 3=DSTF, 4=SIT, 5=CIT, 6=CITz, 7=IGRA, 8=IDEXX). Predictive distributions are plotted as boxplots with central estimate indicated by median, hinges by the 95% interval and full distribution by (thinner) vertical grey lines. is a test statistic for conditional dependence between tests. Observed values of (red points) that lie outside of the posterior predictive distribution from the model are evidence of a lack of model fit which may be due to the presence of conditional dependence between tests or the impact of other confounding factors. For the WH-A model the lack of fit with respect to the prevalence of infection (Supplementary Figure 3) leads to systematic lack of fit with respect to for the 1-2 and 6-7 age groups.


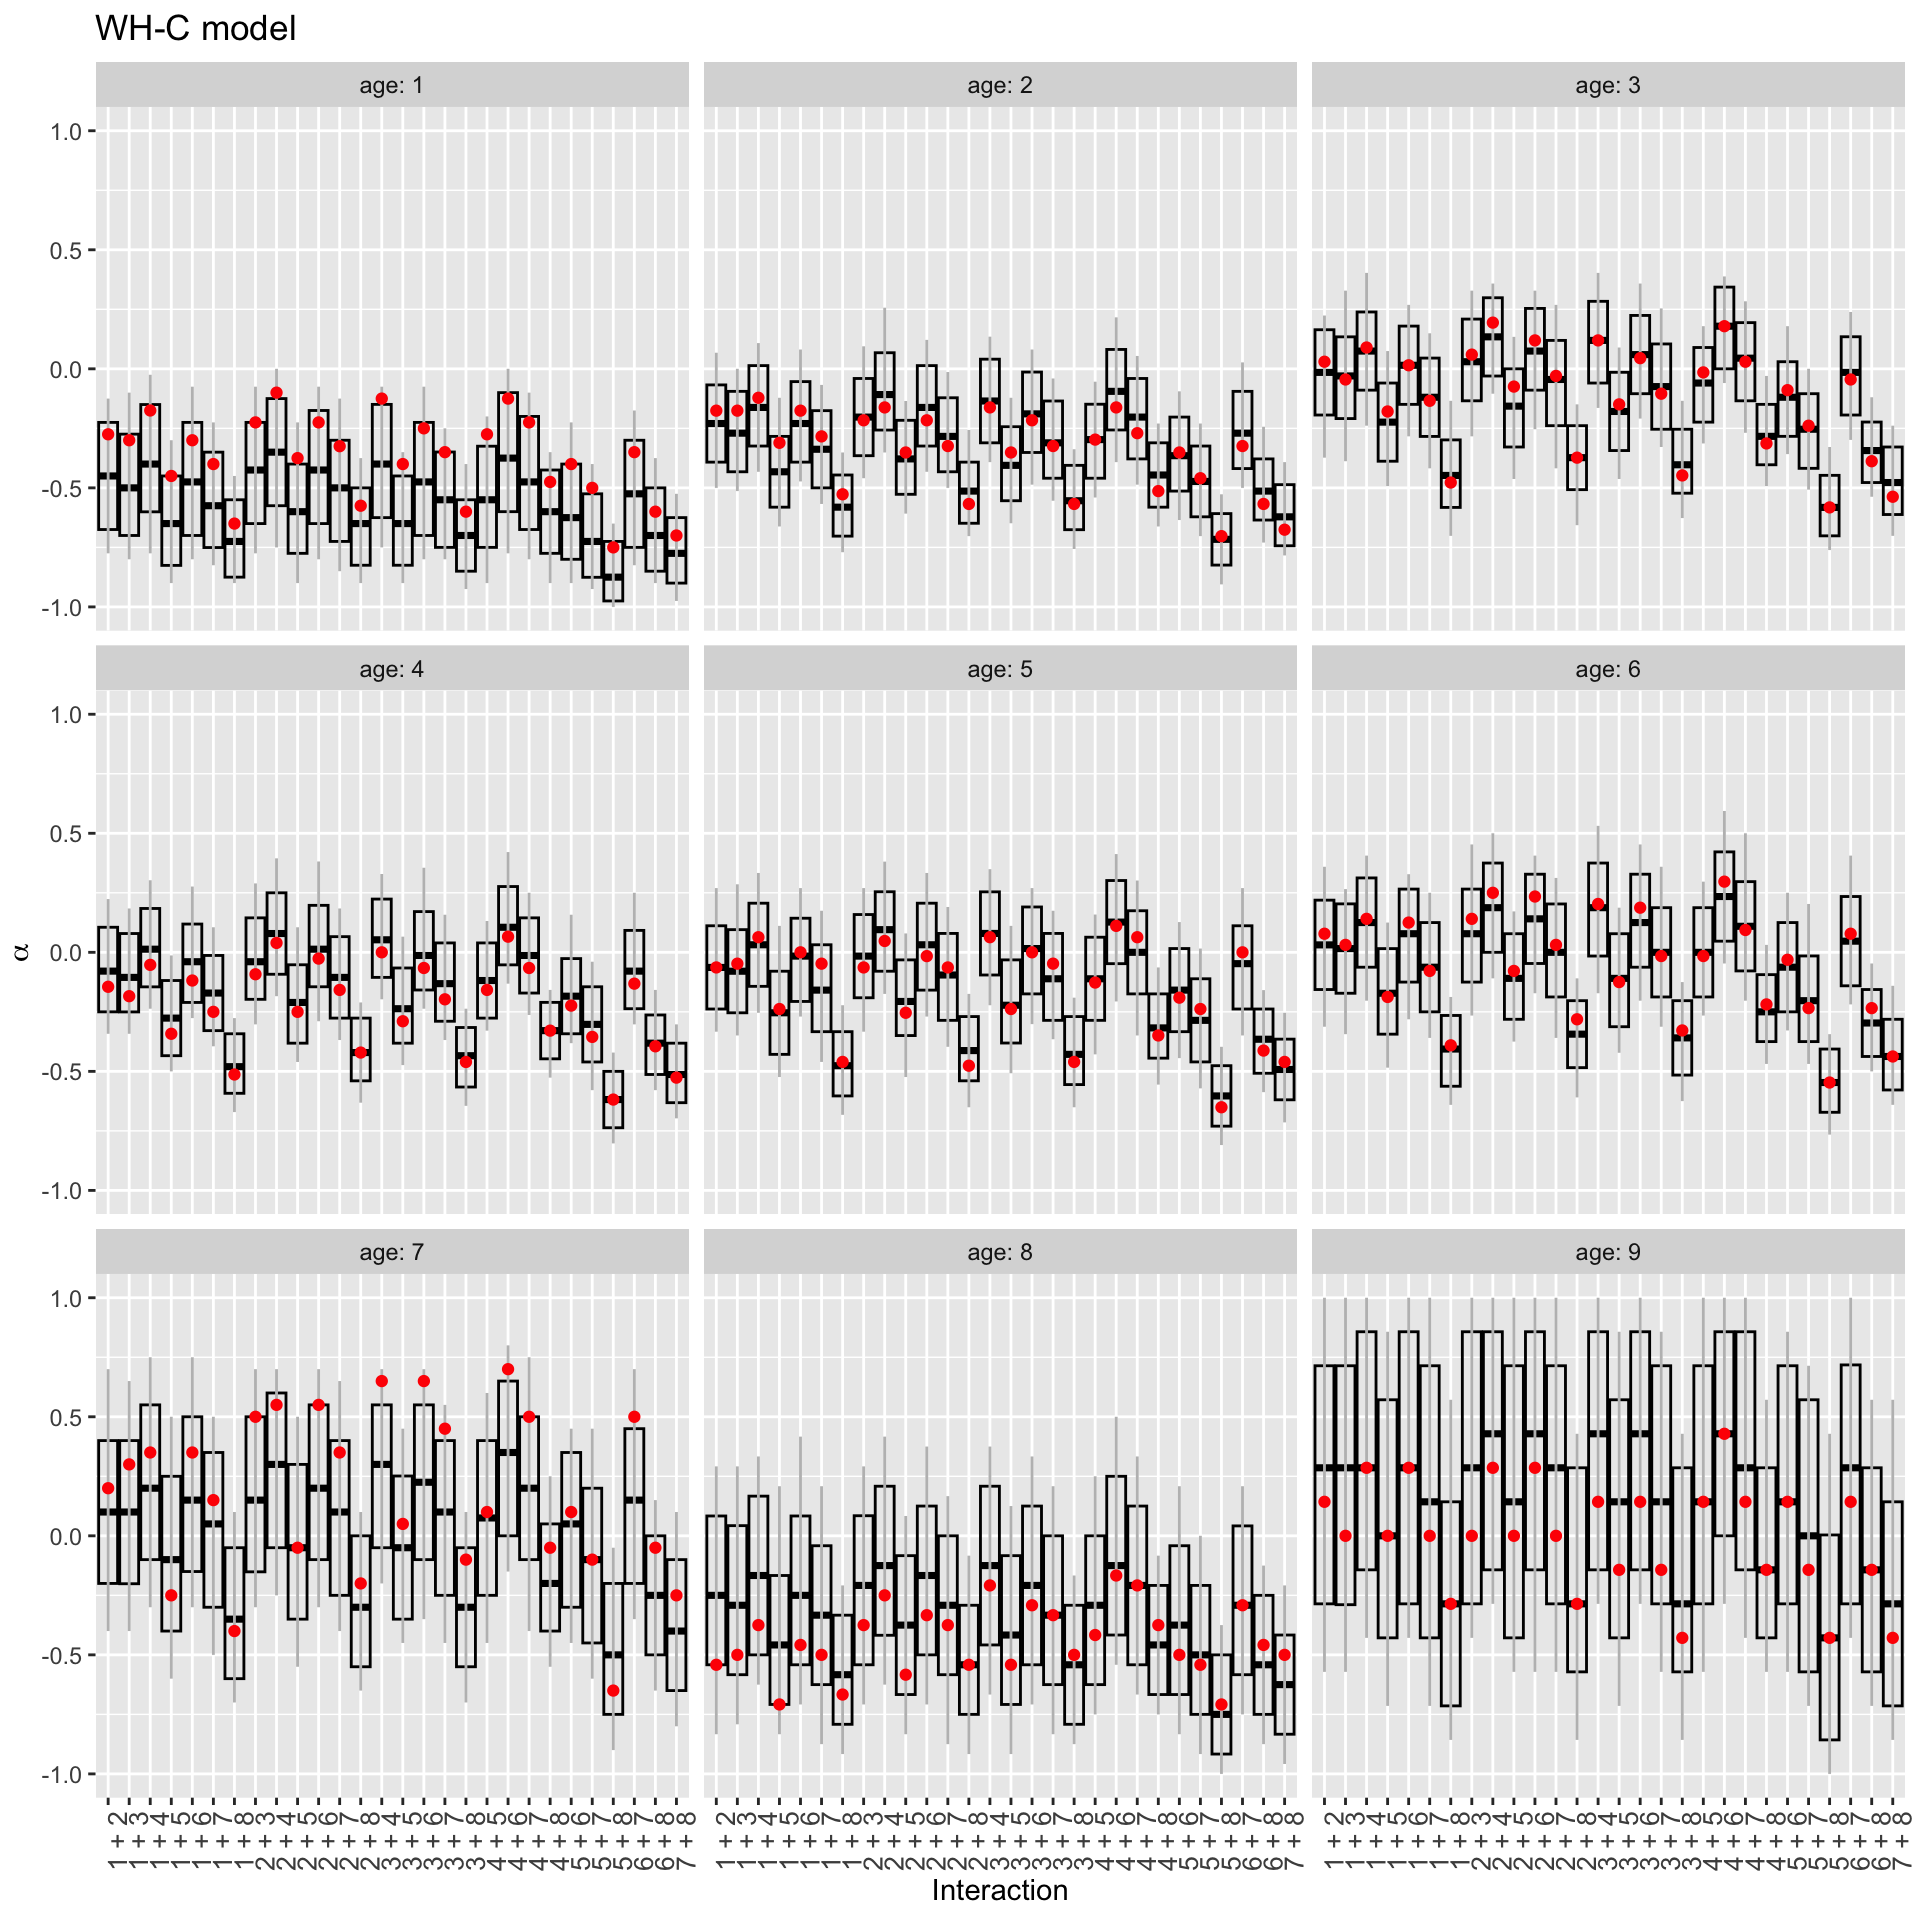


**Supplementary Figure 8:** Posterior predictive distributions for the pairwise probability of agreement between tests ( stratified by age and interaction ( where k numbers the diagnostic tests in order (1=DST10, 2=DST30, 3=DSTF, 4=SIT, 5=CIT, 6=CITz, 7=IGRA, 8=IDEXX). Predictive distributions are plotted as boxplots with central estimate indicated by median, hinges by the 95% interval and full distribution by (thinner) vertical grey lines. is a test statistic for conditional dependence between tests. Observed values of (red points) that lie outside of the posterior predictive distribution from the model are evidence of a lack of model fit which may be due to the presence of conditional dependence between tests or the impact of other confounding factors. For the WH-C model resolving the lack of fit to the age-distribution of infection (Supplementary Figure 4) dramatically improves the models predictive performance with respect to . The systematic lack of fit is resolved with only one interaction (between DST10 and SIT) outside of the 95% interval, but still within the posterior range.


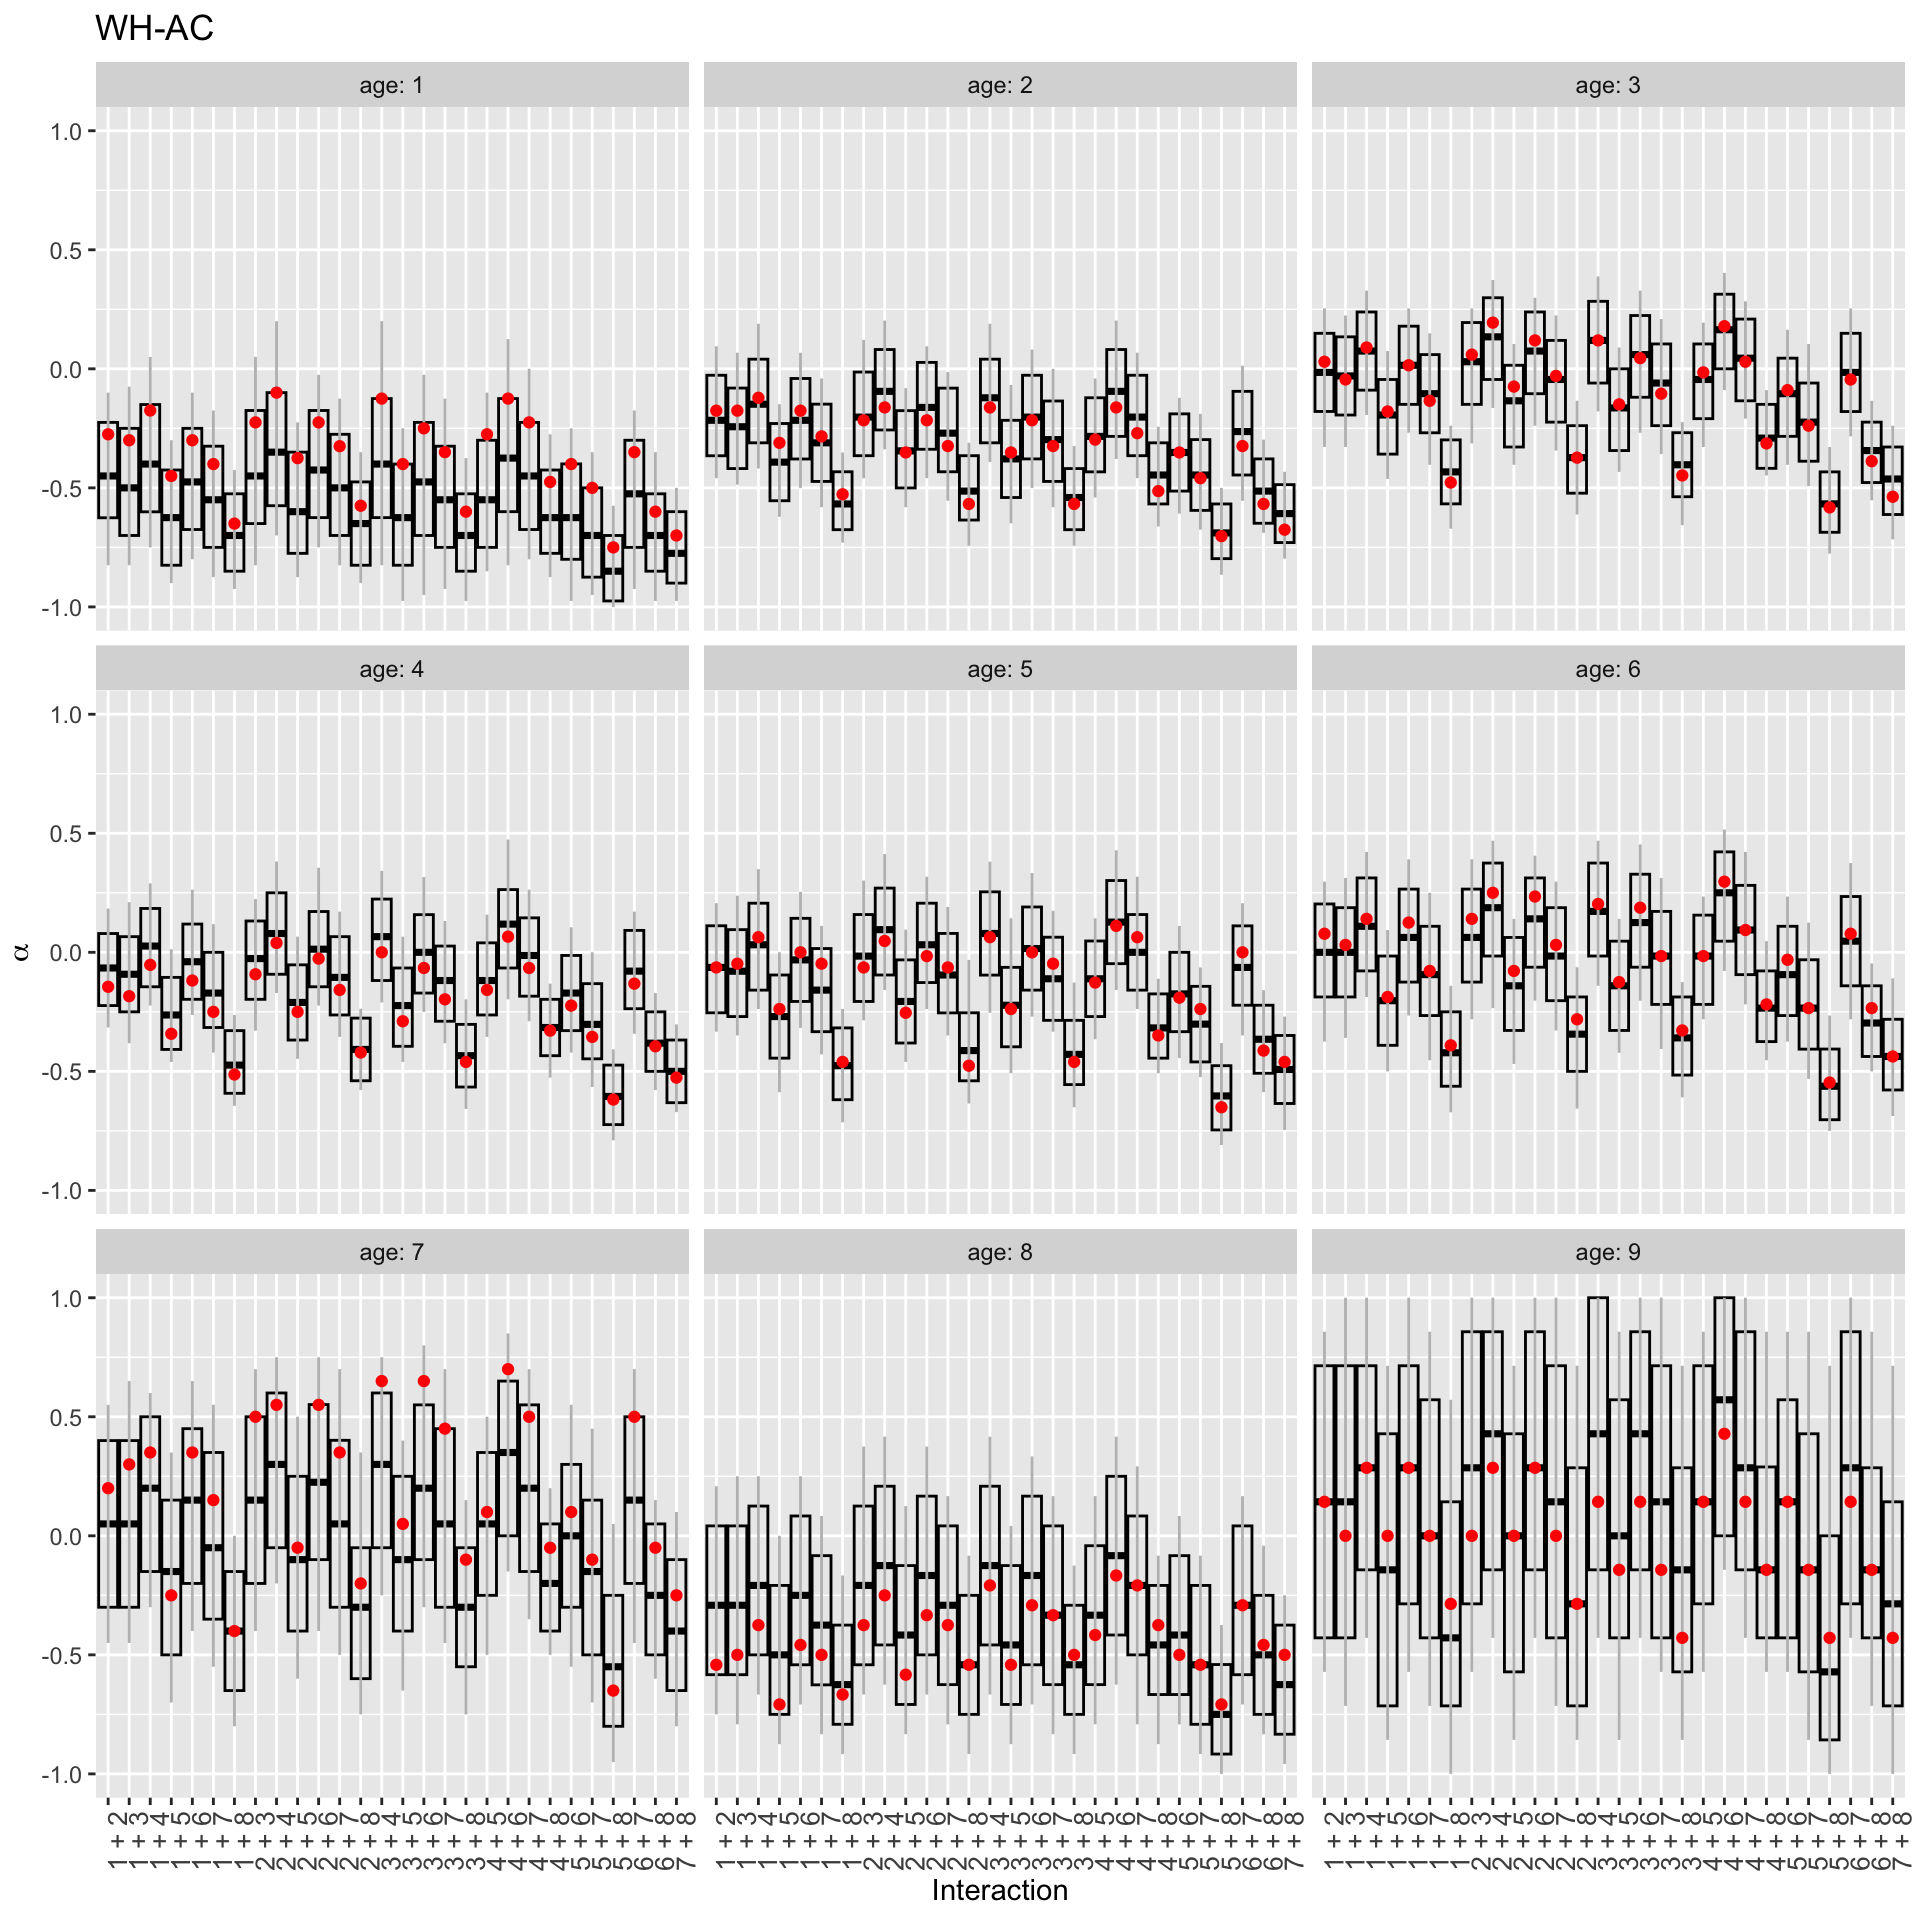


**Supplementary Figure 9:** Posterior predictive distributions for the pairwise probability of agreement between tests ( stratified by age and interaction ( where k numbers the diagnostic tests in order (1=DST10, 2=DST30, 3=DSTF, 4=SIT, 5=CIT, 6=CITz, 7=IGRA, 8=IDEXX). Predictive distributions are plotted as boxplots with central estimate indicated by median, hinges by the 95% interval and full distribution by (thinner) vertical grey lines. is a test statistic for conditional dependence between tests. Observed values of (red points) that lie outside of the posterior predictive distribution from the model are evidence of a lack of model fit which may be due to the presence of conditional dependence between tests or the impact of other confounding factors. For the WH-AC model resolving the lack of fit to the age-distribution of infection (Supplementary Figure 5) dramatically improves the models predictive performance with respect to . The systematic lack of fit is resolved with all observations within or close to the 95% interval.

**
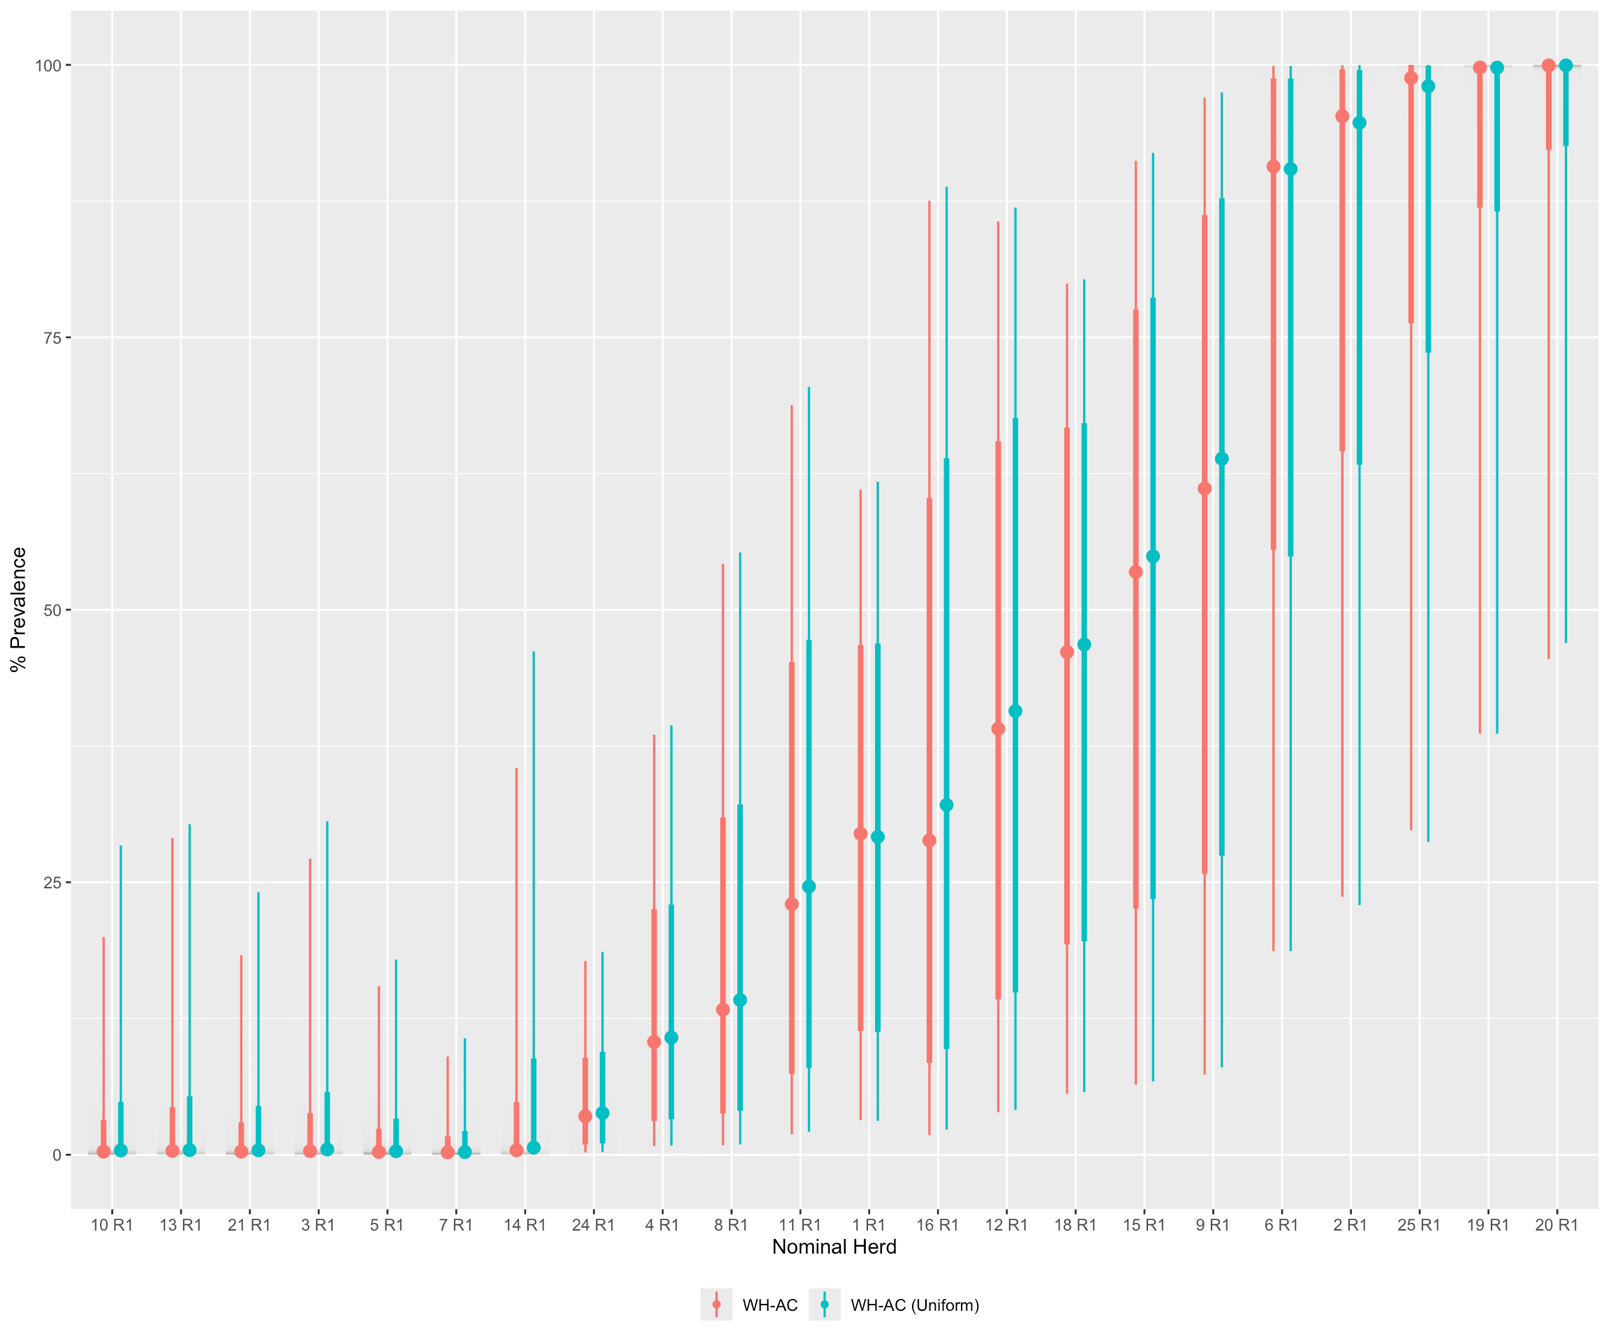
**

**Supplementary Figure 10:** Posterior predictive distributions for the inferred prevalence of bovine tuberculosis within the 33 nominal herds ranked from lowest to highest for both the “WH-AC” (red) and “WH-AC” (Uniform) (blue) model estimates. Predictive distributions are visualized as line intervals indicating the 66 and 95% quantiles of the distribution (thick and thin lines respectively), with points representing the median value. The inferred prevalence within herds ranges from 0-100%, with broad prediction intervals as a consequence not only of the relatively small size of herds, but the significant variation in infection risk with age within these herds.

**
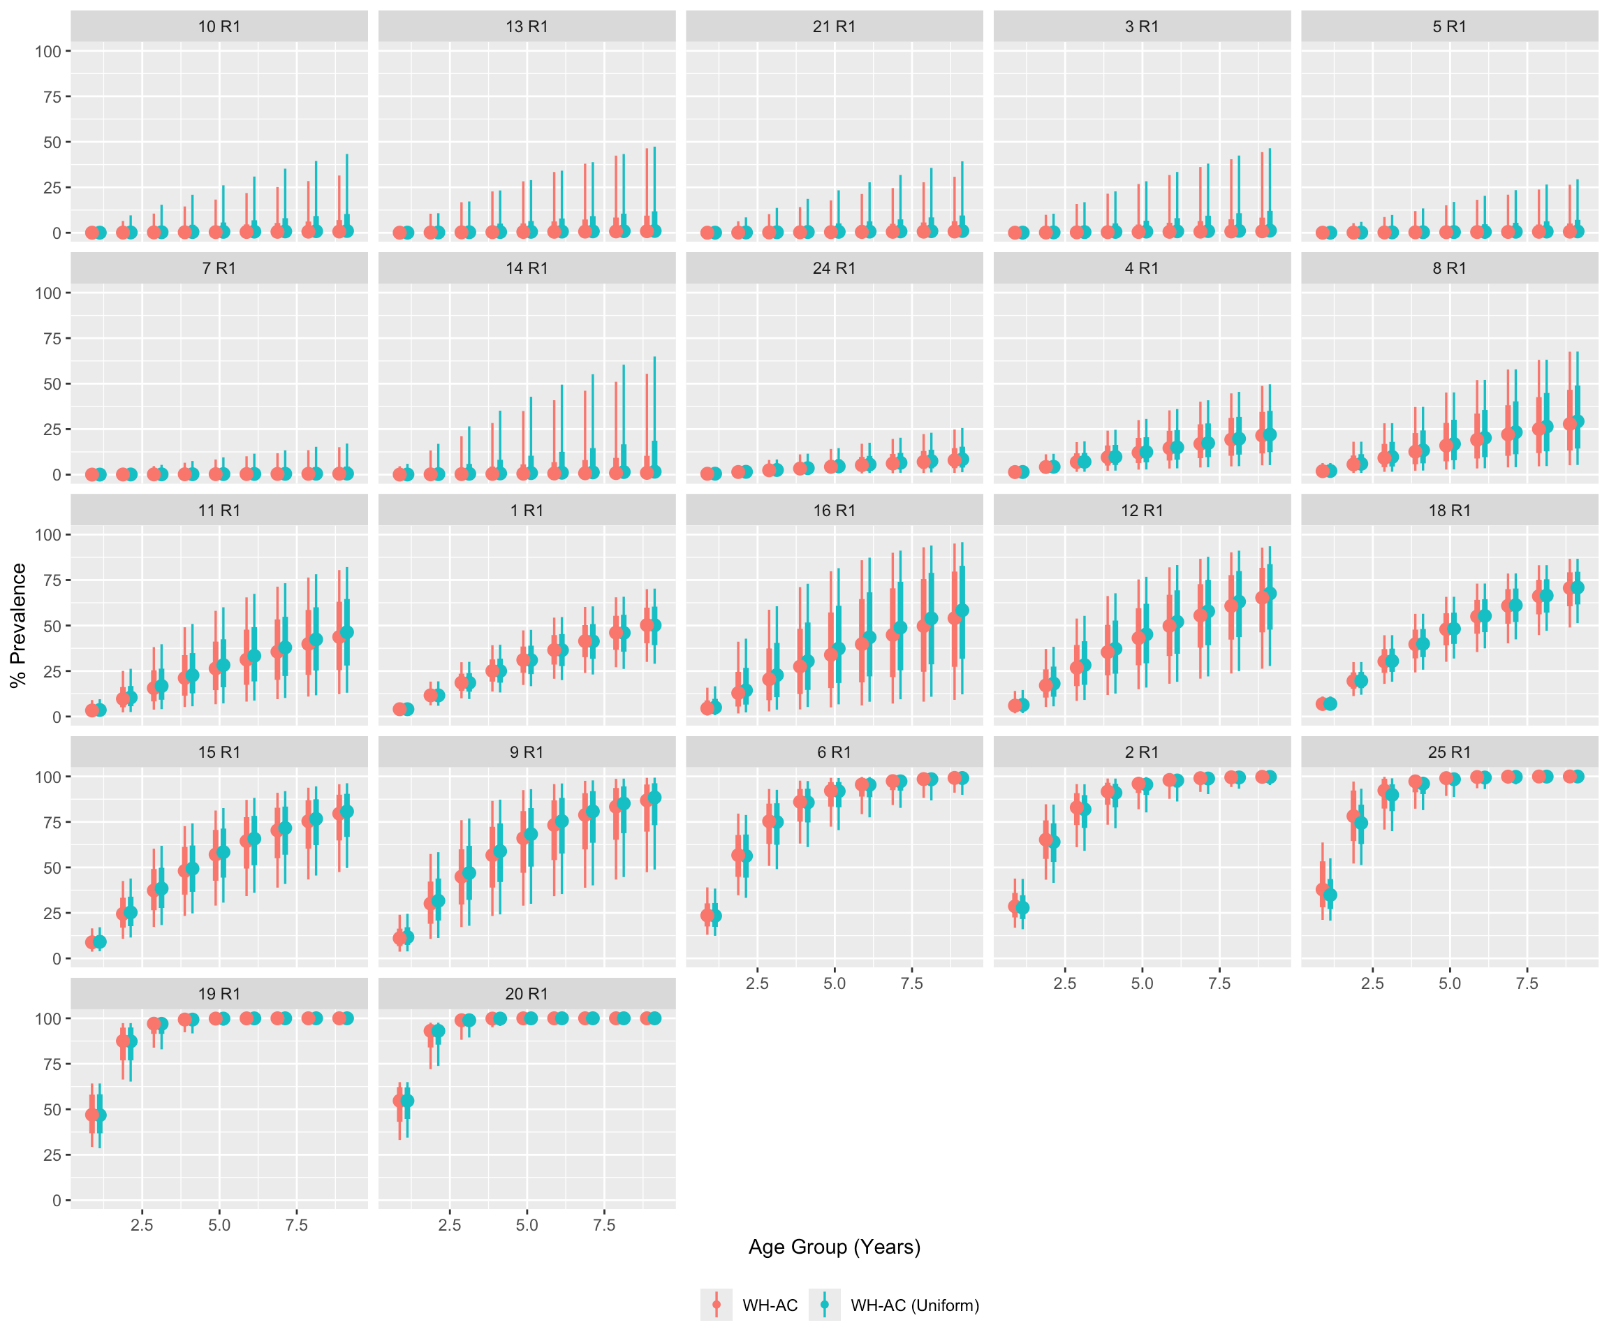
**

**Supplementary Figure 11:** Posterior predictive distributions for the inferred prevalence of bovine tuberculosis stratified by both age and herd and ranked from the lowest to highest average prevalence (as in Supplementary Figure 10). Estimates are presented for both the “WH-AC” (red) and “WH-AC” (Uniform) (blue) models. Predictive distributions are visualized as line intervals indicating the 66 and 95% quantiles of the distribution (thick and thin lines respectively), with points representing the median value.


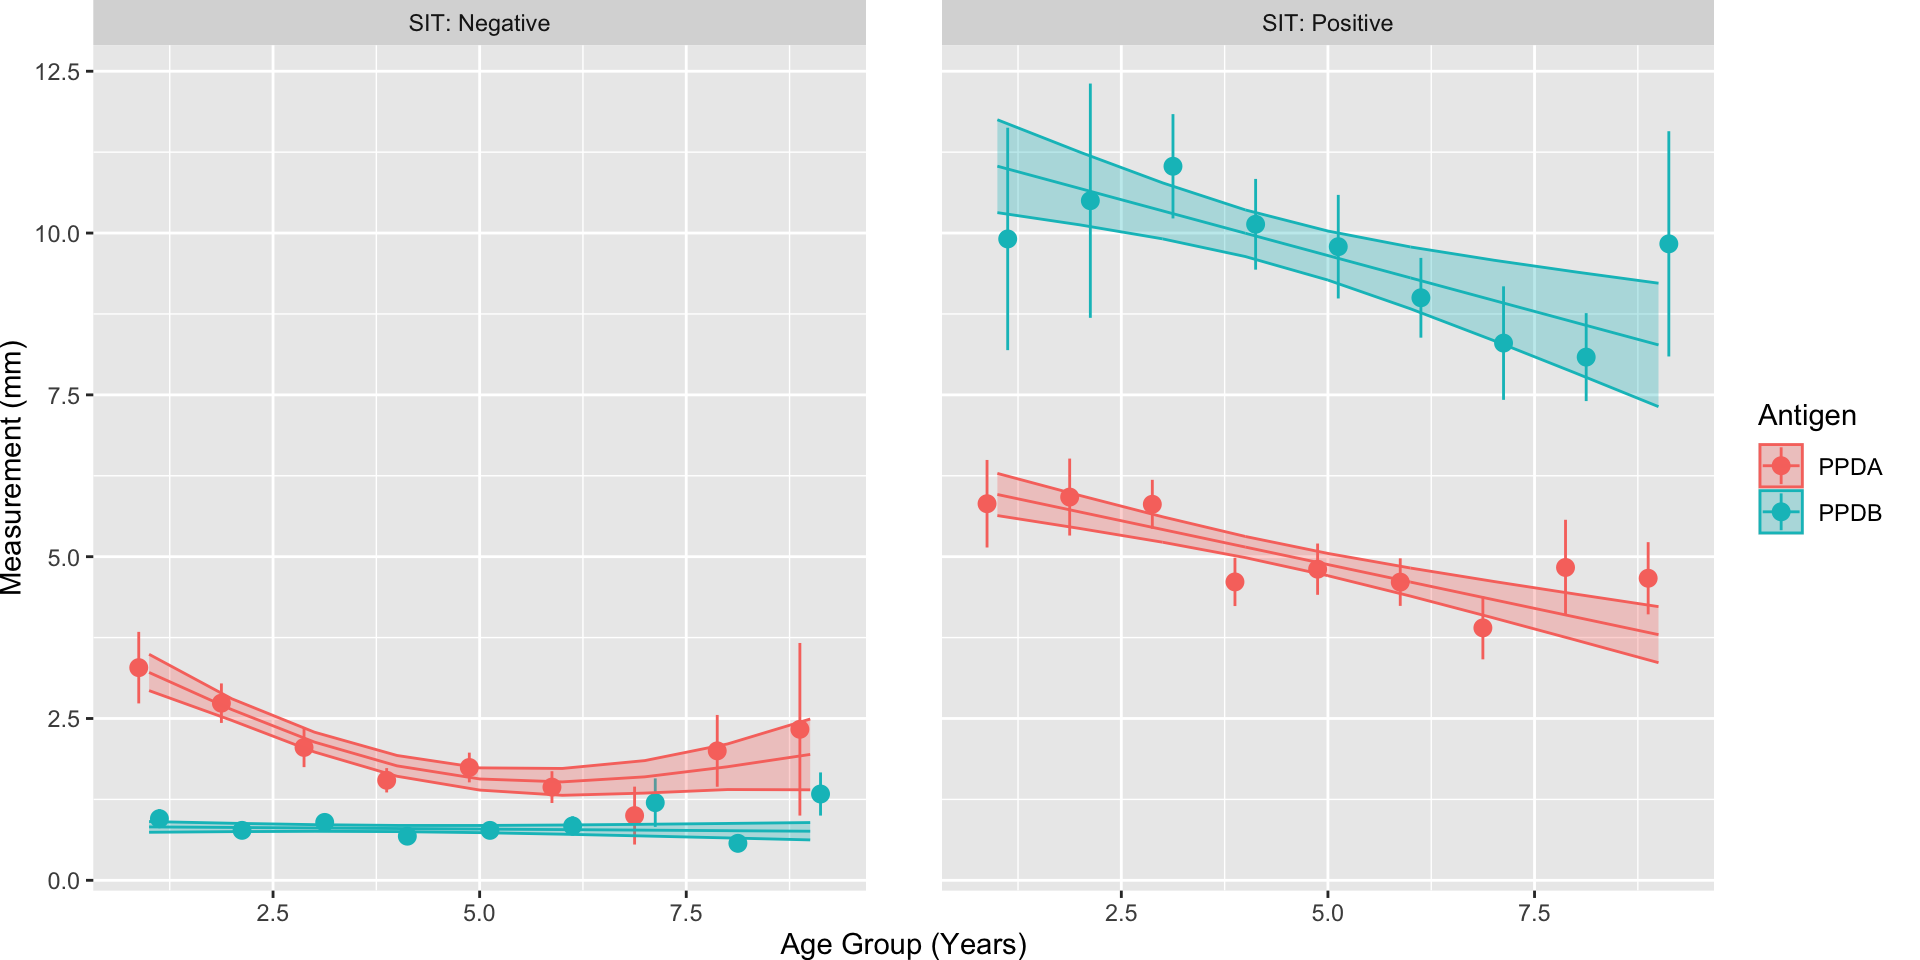


**Supplementary Figure 12:** Size of measured reaction (difference in skin thickness) to bovine (blue) and avian (red) tuberculin as a function of age stratified by SIT (PPDB difference > 2 mm) test status. Point estimates are the average (mean) for age-group with 95% naïve binomial standard errors as a measure of uncertainty (vertical lines). Transparent ribbon plots a (GAM) smoothed trend line with mean and standard errors. For SIT positive animals, the average magnitude of the bovine and avian reaction size declines linearly with age. For negative animals the average bovine reaction size is independent of age, while the avian reaction declines from a peak in the youngest animals to a minimum value in animals around 7 years before increasing again in the oldest age groups.


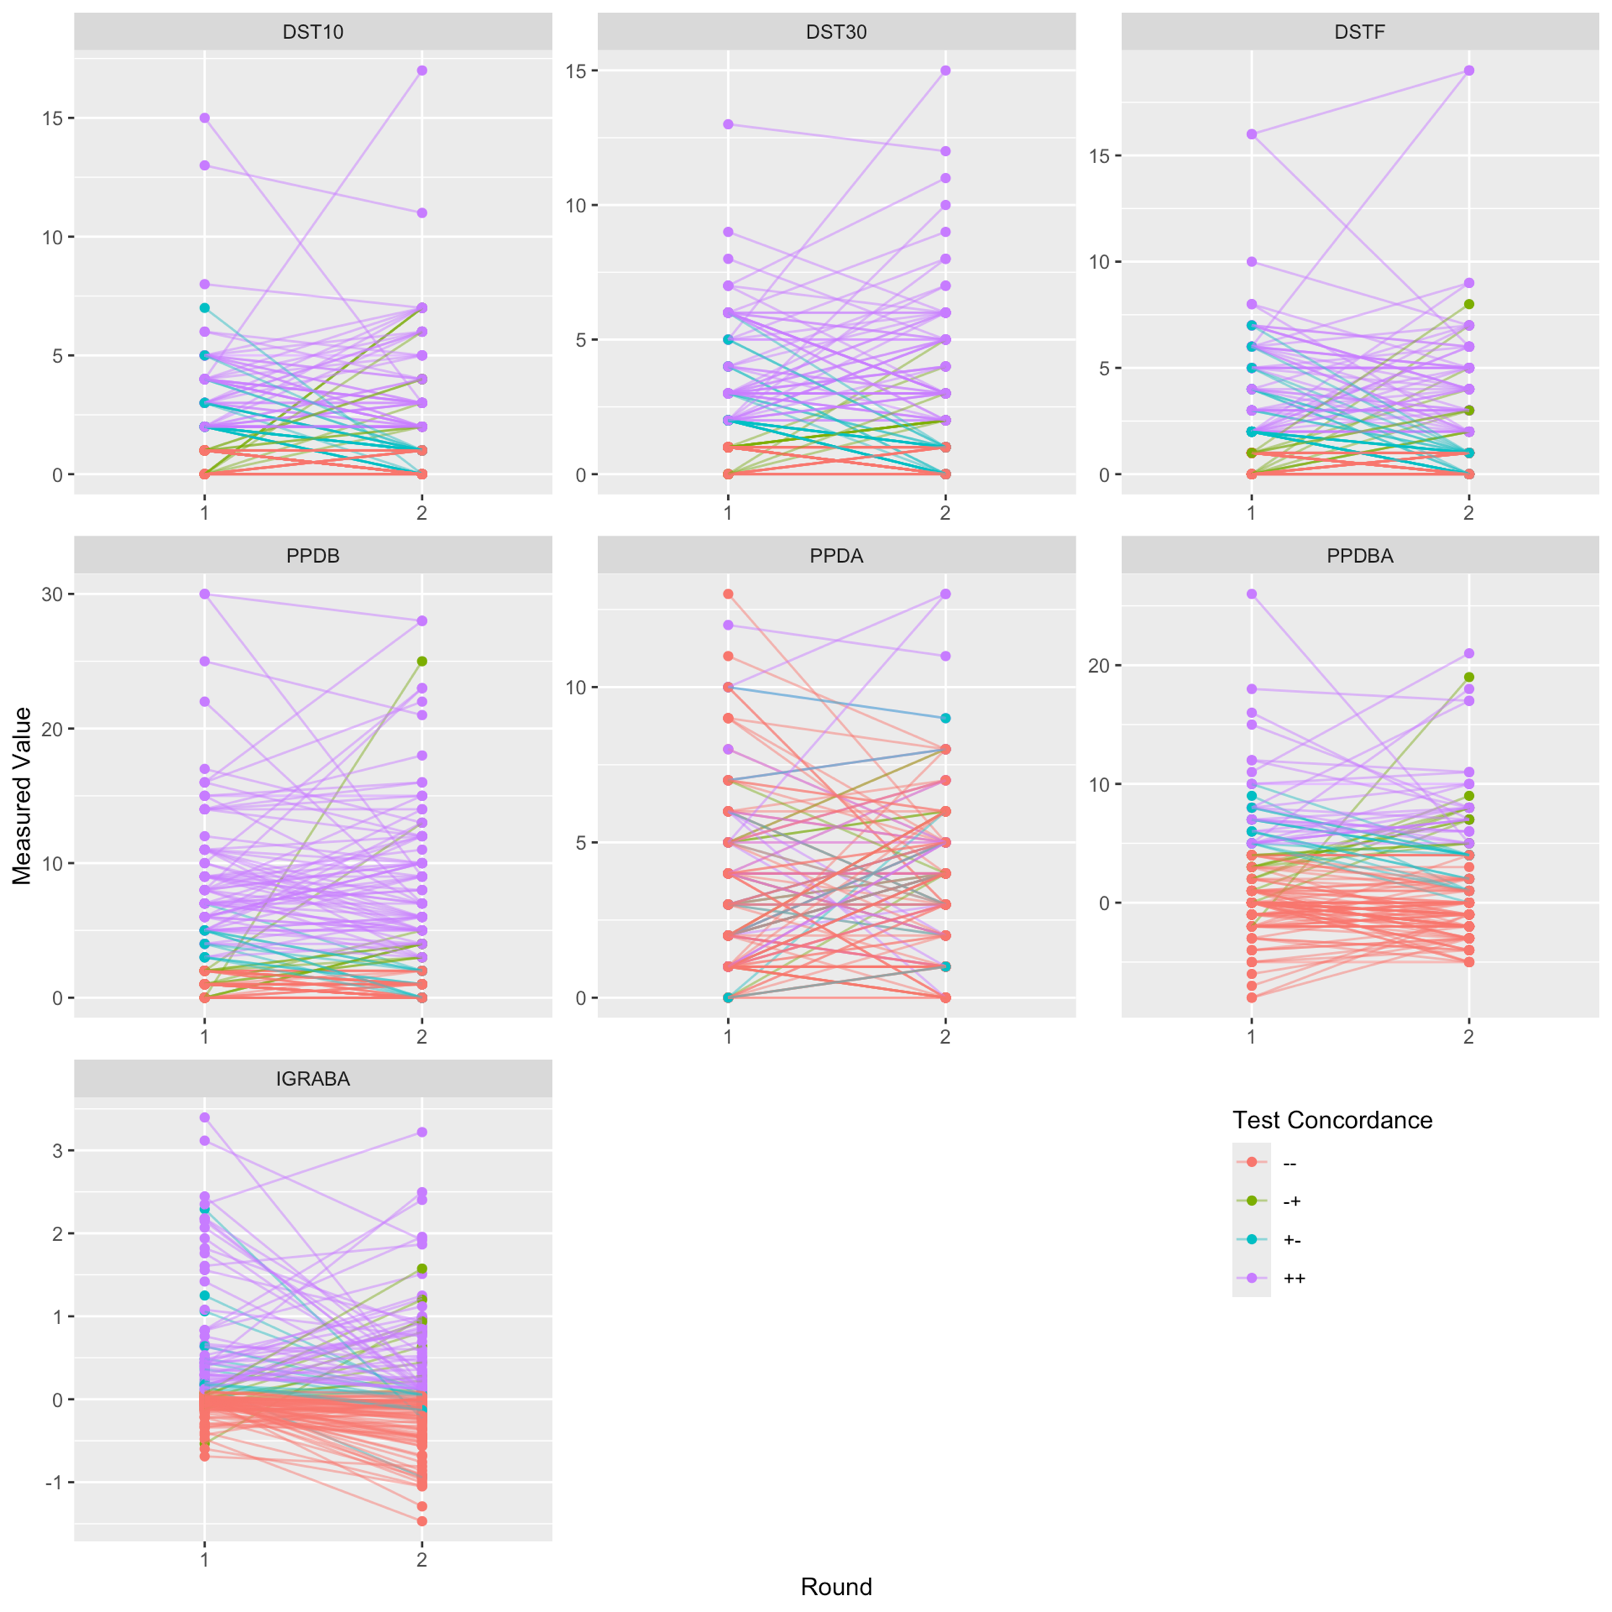


**Supplementary Figure 13:** Parallel coordinate plots of the change in measured responses for diagnostic antigens for the 142 animals that were tested twice. For skin tests (DST10, DST30, DSTF, PPDB, PPDA) the measured value (y axis) at each round of testing (x axis) is the increase in skin thickness, PPDBA is the difference PPDB-PPDA and IGRABA is the difference between the measured OD value for the bovine and avian antigens. Each line corresponds to the change in observed value between the two rounds of testing and are coloured by the concordance of the two test results (-- tests negative in both rounds; -+ test negative in first round, positive in second round; +- test positive in first round, test negative in second round, ++ tests positive in both rounds).
